1 **TITLE: SEMA4C is a novel target to limit osteosarcoma growth,**  
2 **progression, and metastasis**

3  
4 Branden A. Smeester<sup>1,4,5</sup>, Nicholas J. Slipek<sup>1,4,5</sup>, Emily J. Pomeroy<sup>1,4,5</sup>, Heather E.  
5 Bomberger<sup>2</sup>, Ghaidan A. Shamsan<sup>2,5</sup>, Joseph J. Peterson<sup>1,4,5</sup>, Margaret R. Crosby<sup>1,4,5</sup>,  
6 Garrett M. Draper<sup>1,4,5</sup>, Kelsie L. Becklin<sup>1,4,5</sup>, Eric P. Rahrman<sup>6</sup>, James B. McCarthy<sup>3,5</sup>,  
7 David J. Odde<sup>2,5</sup>, David K. Wood<sup>2</sup>, David A. Largaespada<sup>1,4,5</sup>, Branden S. Moriarity<sup>1,4,5</sup>

8  
9 <sup>1</sup>Department of Pediatrics, University of Minnesota

10 <sup>2</sup>Department of Biomedical Engineering, University of Minnesota

11 <sup>3</sup>Department of Laboratory Medicine and Pathology

12 <sup>4</sup>Center for Genome Engineering, University of Minnesota

13 <sup>5</sup>Masonic Cancer Center, University of Minnesota

14 <sup>6</sup>Cancer Research UK Cambridge Institute, University of Cambridge

15  
16  
17 Corresponding author:

18  
19 Dr. Branden S. Moriarity

20 University of Minnesota

21 Department of Pediatrics

22 Cancer and Cardiovascular Research Building (CCRB)

23 2231 6<sup>th</sup> St. SE

24 Minneapolis, MN 55455

25  
26 (e): mori0164@umn.edu

27 (p): 612-625-4189

28  
29  
30  
31  
32  
33  
34  
35  
36  
37  
38  
39  
40  
41  
42  
43  
44  
45  
46

## 47 **Abstract**

48           Semaphorins, specifically type IV, are important regulators of axonal guidance and  
49 have been increasingly implicated in poor prognoses in a number of different solid  
50 cancers. In conjunction with their cognate PLXNB family receptors, type IV members have  
51 been increasingly shown to mediate oncogenic functions necessary for tumor  
52 development and malignant spread. In this study, we investigated the role of semaphorin  
53 4C (SEMA4C) in osteosarcoma growth, progression, and metastasis. We investigated  
54 the expression and localization of SEMA4C in primary osteosarcoma patient tissues and  
55 its tumorigenic functions in these malignancies. We demonstrate that overexpression of  
56 SEMA4C promotes properties of cellular transformation, while RNAi knockdown of  
57 SEMA4C promotes adhesion and reduces cellular proliferation, colony formation,  
58 migration, wound healing, tumor growth, and lung metastasis. These phenotypic changes  
59 were accompanied by reductions in activated AKT signaling, G1 cell cycle delay, and  
60 decreases in expression of mesenchymal marker genes *SNAI1*, *SNAI2*, and *TWIST1*.  
61 Lastly, monoclonal antibody blockade of SEMA4C *in vitro* mirrored that of the genetic  
62 studies. Together, our results indicate a multi-dimensional oncogenic role for SEMA4C in  
63 metastatic osteosarcoma and more importantly that SEMA4C has actionable clinical  
64 potential.

65

## 66 **1. Introduction**

67           Osteosarcoma is a malignant, primarily pediatric tumor, of the growing long bones  
68 with peak incidence in the second decade of life [1]. Derived from mesenchymal origins  
69 in the pre-osteoblastic lineage, osteosarcomas arise from the failure of osteoblasts to

70 differentiate into mature bone-building cells [2]. Osteosarcomas are commonly typified by  
71 their heterogeneity, genomic instability, and frequency of systemic metastasis primarily  
72 to the lungs [3, 4]. Despite advances in chemotherapy regimens and surgical resection,  
73 survival rates for patients with osteosarcoma have remained stagnant for more than four  
74 decades [5]. The complex nature of osteosarcoma presents unique difficulties with  
75 respect to elucidating novel therapeutic targets and identifying treatment strategies that  
76 may prove most effective, particularly across individual patients. Given this, it is critically  
77 important to better understand not only the mechanisms specific to osteosarcoma  
78 development and progression, but most importantly metastasis, in order to develop better  
79 treatment options for patients with this devastating disease.

80         Semaphorins are a family of membrane-bound and soluble proteins that modulate  
81 a whole host of cellular functions including differentiation, cytoskeletal rearrangement,  
82 and motility [6]. Interestingly, semaphorin family members have been reported to mediate  
83 many hallmarks of cancer including cellular proliferation, angiogenesis, and immune  
84 escape [7-9]. Recent evidence from studies of the SEMA4-PLXNB family of axonal  
85 guidance molecules in normal bone cells suggests that osteoclastic expression of  
86 SEMA4D inhibits osteoblastic bone formation through suppression of IGF1 signaling [6,  
87 10], however, recent data from our lab suggests that high expression of SEMA4D is  
88 oncogenic in osteosarcoma [11]. Given osteosarcomas retain mesenchymal-like  
89 characteristics [12], this suggests the possibility of SEMA4 members signaling through  
90 similar pathways during osteosarcomagenesis as they do during normal bone  
91 development.

92           Furthermore, activation of downstream signaling processes that involve the MAP  
93 kinase/PI3K pathways through heterodimerization with other receptor tyrosine kinases  
94 (RTKs) such as MET (MET proto-oncogene, receptor tyrosine kinase) and/or ERBB2  
95 (erb-b2 receptor tyrosine kinase 2) can potentiate many of the invasive cellular processes  
96 associated with solid cancers [13]. SEMA4C, a type IV semaphorin, and its cognate  
97 receptor PLXNB2, have been recently characterized as oncogenic signaling partners in  
98 invasive breast cancer [14], hepatocellular carcinoma [15], and glioma [16]. Moreover,  
99 SEMA4C has been shown to play diverse roles in the propagation of pain signaling [17],  
100 as well as in the immune system during Th2-driven immune responses similar to other  
101 semaphorin IV family members [18].

102           Here, we studied SEMA4C's role in osteosarcoma growth and metastasis. We  
103 show that 1) SEMA4C is upregulated in a subset of osteosarcoma patient samples and  
104 cell lines; 2) high SEMA4C expression enhances properties of cellular transformation,  
105 mesenchymal marker expression, and that genetic knockdown conversely reduces those  
106 phenotypes/markers; 3) SEMA4C modulates osteosarcoma growth and lung metastasis  
107 and 4) targeted monoclonal antibody blockade of SEMA4C robustly reduces these  
108 phenotypes associated with high-level SEMA4C expression. Together, this study  
109 expands upon the current known functions of SEMA4C in a highly malignant pediatric  
110 solid cancer and suggests that antibody blockade of SEMA4C-PLXNB2 signaling may  
111 overcome the current hurdles for targeting pathways that ultimately lead to metastatic  
112 lung nodule formation and continued disease progression.

113

## 114 **2. Materials and Methods**

## 115 **2.1 RNA sequencing data sets**

116 *SEMA4C* expression levels in normal human osteoblasts and human  
117 osteosarcoma patient samples were analyzed from an existing data set [11].

118

## 119 **2.2 Tissue microarray (TMA) samples and scoring**

120 The osteosarcoma tissue microarray was purchased from Biomax (Osteosarcoma:  
121 OS804c) containing 40 samples in duplicate. Slides containing 4  $\mu$ m thick formalin-fixed,  
122 paraffin-embedded sections of tumor tissue were deparaffinized and rehydrated. Antigen  
123 retrieval was performed in a steamer using 1 mM Tris base EDTA buffer, pH 9.0. After  
124 endogenous peroxidase blocking, a protein block was applied. Immunohistochemistry  
125 (IHC) for SEMA4C was performed using a rabbit anti-SEMA4C primary antibody  
126 (#AF6125, R & D Systems) on an autostainer (Dako). Detection was achieved using the  
127 Envision rabbit detection system (Dako) with diaminobenzidine (DAB) as the chromogen.  
128 Tissue sections were imaged on a Nikon E800M microscope at 40X magnification using  
129 a Nikon DSRi2 camera and Nikon Elements D Version 4 software. Slides were evaluated  
130 and scored as previously described [19].

131

## 132 **2.2 Cell culture**

133 All osteosarcoma cell lines were purchased and obtained from the American Type  
134 Culture Collection (ATCC). Normal human osteoblasts (NHOs) and primary human  
135 umbilical vein cells (HUVECs) were purchased from Lonza. All cell lines were grown and  
136 maintained in accordance with standard cell culture techniques. Both HOS and MG-63  
137 cells were grown in DMEM. G-292 cells were grown in McCoy's 5A. SJSA-1 cells were

138 grown in RPMI-1640. NHOs were grown in  $\alpha$ MEM. Osteosarcoma cell line media was  
139 fortified with 10% fetal bovine serum (FBS) and 1X penicillin/streptomycin and NHO  
140 media was fortified with 20% FBS and 1X penicillin/streptomycin. HUVECs were cultured  
141 with EGM-2 bullet kit media (#cc-3162, Lonza) with 1X antibiotic-antimycotic (#15240062,  
142 Thermo Fisher) in cell culture flasks coated with 1% gelatin (#G1383, Sigma Aldrich).. All  
143 cell cultures were incubated in a water-jacketed incubator set at 5% carbon dioxide (CO<sub>2</sub>)  
144 and at 37°C. All cell lines except NHO, G-292, and HUVECs were authenticated by the  
145 University of Arizona Genetics Core (UAGC) using short tandem repeat profiling. All cell  
146 lines were found to be free from mycoplasma.

147

### 148 **2.3 Generation of shRNA knockdown and overexpression cell lines**

149 Stable knockdown of SEMA4C was accomplished with pGIPZ lentiviral vectors  
150 expressing an shRNA against SEMA4C in conjunction with GFP and a puromycin  
151 selection marker (sh1 #V3LHS\_394644, sh2 #V3LHS\_413698, Open Biosystems).  
152 Control pGIPZ vector with non-targeting shRNA was used as a control (#RHS4346, Open  
153 Biosystems). Lentiviral particles were produced with 293T cells co-transfected with pGIPZ  
154 shRNAs, pMD2.G envelope (#12259, addgene) and psPAX2 (#12260, addgene)  
155 packaging vectors. Stable shRNA knockdown lines were established via puromycin  
156 selection at 1  $\mu$ g/mL. Overexpression vectors were generated using the human *SEMA4C*  
157 cDNA sequence (#40035253, Dharmacon) and vectors/cell lines were established using  
158 previously described methodology [20, 21].

159

### 160 **2.4 Anti-SEMA4C antibody treatment *in vitro***

161 Anti-SEMA4C or isotype control antibody was administered at 10  $\mu\text{g}/\text{mL}$  and 15  
162  $\mu\text{g}/\text{mL}$  where indicated (#sc-136445, Santa Cruz Biotechnology).

163

## 164 **2.5 RNA isolation and Quantitative RT-PCR**

165 Total RNA was extracted from cell lines using the High Pure RNA Isolation Kit  
166 (Roche, Basel). 1  $\mu\text{g}$  of extracted RNA was reverse transcribed into cDNA using the  
167 Transcriptor First Strand Synthesis kit (Roche). Quantitative RT-PCR was performed in  
168 triplicate using SYBR green mix (Qiagen) on an ABI 7500 machine (Applied Bio Systems).  
169 Primer sequences are available in Suppl. Table 2. All measurements were calculated  
170 using the  $\Delta\Delta\text{CT}$  method and expressed as fold change relative to respective control non-  
171 silencing shRNA line (shCON).

172

## 173 **2.6 ELISA**

174 Quantification of levels of soluble SEMA4C secreted in the conditioned media (72  
175 hours) of indicated cell lines was performed via manufacturer's instructions  
176 (#MBS705730, MyBioSource).

177

## 178 **2.7 Western blot**

179 Protein was extracted from cultured cells in RIPA buffer containing a protease  
180 inhibitor (Roche) and phosphatase inhibitors (Sigma-Aldrich). Total protein was quantified  
181 using BCA (Thermo Fisher). Cell lysate was loaded and run on 4-12% Bis-Tris gels  
182 (Thermo Fisher) and transferred to PVDF membranes (Bio-Rad). Membranes were  
183 blocked in 5% nonfat dry milk for 1 hour (Bio-Rad) and incubated gently shaking overnight

184 at 4°C in 1° antibody/PBS-T. Subsequently, membranes were washed and incubated in  
185 conjugated 2° antibodies for 1 hour. Blots were thoroughly washed following 2° incubation  
186 and developed using the WesternBright Quantum detection kit (Advansta) and the LICOR  
187 Odyssey (LICOR). A complete list of antibodies and other reagents utilized is available in  
188 Supp. Table 1. Densitometry was performed on all images. Bands were compared to each  
189 respective loading control, normalized to 1, and compared.

190

## 191 **2.8 MTS cellular proliferation assay**

192 Cellular proliferation assays were performed as previously described [11]. Briefly,  
193 modified cells ( $1.2 \times 10^3$ ) were plated per well in 96-well plates. Cells were measured at  
194 24, 48, 72, and 96 hours post plating. Absorbances at 490 nm and 650 nm were read  
195 using a SynergyMx (BioTek) fluorescence plate reader.

196

## 197 **2.9 Transwell migration assay**

198 Modified cells ( $2.5 \times 10^4$ ) were seeded in 500  $\mu$ L of serum free media in the upper  
199 chamber of 8  $\mu$ m inserts (Corning). The lower chamber was filled with 750  $\mu$ L media  
200 fortified with 10% fetal bovine serum (FBS) as a chemo attractant. After 24 hours, non-  
201 migrating cells were removed with a cotton swab. Migrated cells located on the lower  
202 side of the chamber were fixed with crystal violet, air-dried, and photographed to quantify  
203 migration of cells. For anti-SEMA4C studies, cells were seeded into the top chamber with  
204 antibody following a 6-hour pre-treatment at indicated concentration.

205

## 206 **2.10 Wound healing assay**



207 Wound healing assays were performed as previously described [20]. Briefly, 1 x  
208  $10^4$  cells were plated into a removable 2-well silicone culture insert which generated a  
209 defined cell-free gap (ibidi). Cells were then incubated for 24 hours before inserts were  
210 removed and fresh cell culture media was added. Phase contrast images of the wounds  
211 were acquired every 10 minutes for 16-20 hours, which was sufficient for the cells to  
212 completely close the simulated wound gap. A custom-written image segmentation  
213 algorithm in MATLAB was used to measure wound distance over time and to calculate  
214 closure rate.

215

### 216 **2.11 3D microfluidic cellular adhesion assay**

217 Cellular adhesion assays were performed as previously described [22]. Briefly, the  
218 microfluidic model was fabricated using standard soft lithography of polydimethylsiloxane  
219 (PDMS) (#4019862, Ellsworth). Rat tail collagen I (#CD354249, Corning) was buffered  
220 with PBS and cell culture grade water to create a 6 mg/mL solution. Collagen was then  
221 loaded into the lower channel of the microfluidic model and allowed to nucleate at 37°C  
222 for at least 1 hour. The upper channel was coated with 1% gelatin solution for 30 minutes  
223 at room temperature. HUVECs were released using trypsin, resuspended in a 4% w/v  
224 dextran (#31392, Sigma Aldrich) solution in EGM-2 media at a concentration of  
225 approximately  $1 \times 10^6$  cells per mL, and 50  $\mu$ L of the cell solution was added to the inlet  
226 of the microfluidic model. HUVECs become confluent in the channel over 24-48 hours at  
227 37°C.  $5 \times 10^4$  green fluorescent protein (GFP)-expressing osteosarcoma cells were then  
228 added to the inlet of the model and allowed to adhere over 3 hours. Microfluidic models  
229 were imaged at 24 hours. Adhesion and invasion of osteosarcoma cells was quantified.

230

## 231 **2.12 Soft agar colony formation assay**

232 Modified cells ( $1 \times 10^4$ ) were seeded into a 0.35% agar solution placed on top of a  
233 0.5% agar in six-well plates and allowed to incubate for 2-3 weeks. The resultant colonies  
234 were fixed, divided into four quadrants, and imaged using microscopy. Colonies were  
235 quantified via ImageJ v1.52a software using a standard colony quantification macro [11].

236

## 237 **2.13 Flow cytometry**

238 Cells were fixed with 2% paraformaldehyde (Electron Microscopy Sciences) and  
239 permeabilized with cold 90% methanol (Sigma). Cell cycle analysis was performed using  
240 PI/RNase Staining Buffer (BD Pharmingen). Cleaved caspase 3 (Asp175, clone D3E9)  
241 PE was purchased from Cell Signaling Technologies and cells were stained according to  
242 manufacturer's recommendations. Cells were analyzed on an LSR II or Fortessa digital  
243 flow cytometer (BD Biosciences) at the University of Minnesota Flow Cytometry  
244 Resource. Analysis was performed using FlowJo software.

245

## 246 **2.14 Orthotopic osteosarcoma mouse model**

247 All animal procedures were performed in accordance with protocols approved at  
248 the University of Minnesota in conjunction with the Institutional Animal Care and Use  
249 Committee (IACUC). Modified cells ( $2.5 \times 10^5$ ) were injected into the calcaneus of 6-8-  
250 week-old immunocompromised mice (NOD Rag Gamma, Jackson Labs) [23-25]. Tumor  
251 volume was calculated via caliper measurements using the formula  $V = (W*W*L)/2$  where  
252  $V$  equals tumor volume,  $W$  equals tumor width and  $L$  equals tumor length [26].

253

## 254 **2.15 Lung metastasis evaluation**

255           Micrometastatic nodules were examined via H & E histology at 4X magnification.  
256           Quantification of nodule number and area was undertaken in 9 sections from four  
257           mice/group (shCON and shSEMA4C) at 4X using ImageJ v1.52a software.

258

## 259 **2.16 Statistical analysis**

260           All statistical analyses were performed using Prism v8 software (GraphPad). All  
261           data are presented as mean  $\pm$  standard error of the mean (SEM). Two groups were  
262           compared using a two-tailed unpaired Student's t-test. Three or more groups were  
263           compared using a One-way ANOVA with Bonferroni's post hoc or Two-way ANOVA  
264           analyses were performed and followed with Bonferroni's post hoc testing. All statistical  
265           analyses are individually indicated where applied throughout. In all cases,  $p < 0.05$  was  
266           considered statistically significant.

267

## 268 **3. Results**

### 269 **SEMA4C is highly expressed in some osteosarcoma tissues and cell lines**

270           In order to investigate the potential role of SEMA4C in osteosarcoma development  
271           and metastasis, we first examined *SEMA4C* mRNA expression in 12 human  
272           osteosarcoma clinical samples and in 3 normal human osteoblast control samples (Fig.  
273           1A). Human osteosarcoma samples had significantly higher *SEMA4C* expression when  
274           compared to normal human osteoblasts, (Fig. 1A;  $*p < 0.05$ ). Next, we examined  
275           SEMA4C protein expression in a commercially available human osteosarcoma TMA

276 (Figs. 1B and C). When all 40 sections were quantified, 32.5% had weak expression,  
277 47.5% had moderate expression, and 20.0% had strong expression of SEMA4C (Fig. 1B).  
278 Representative images of each staining pattern are shown in Fig. 1C. The majority of  
279 tissue sections were greater than 75% SEMA4C positive (Supp. Fig. 1A) and had  
280 primarily cytoplasmic/membraneous staining localization (Supp. Fig. 1B). These results  
281 indicate that a subset of osteosarcoma patient tissues express high levels of SEMA4C.  
282 We next probed a number of commercially available osteosarcoma cell lines for SEMA4C  
283 and cognate receptor PLXNB2 expression via western blot and compared them to normal  
284 human osteoblasts (NHO). Relative to the NHOs, most osteosarcoma cell lines examined  
285 expressed detectable membrane-bound SEMA4C (Fig. 1D). Both MG-63 and G-292 cells  
286 had no detectable expression in Fig. 1D, but was minimally detectable in Fig. 2A at high  
287 exposures. Since SEMA4C is known to be shed from the extracellular membrane [27],  
288 we also analyzed cell culture media of indicated cell lines for the presence of soluble  
289 SEMA4C (Fig. 1E). Soluble SEMA4C was detectable in all lines including NHO, however,  
290 soluble SEMA4C was expressed at significantly elevated levels in U2OS, HOS, SJSA-1,  
291 and MG-63 osteosarcoma cell lines as compared to NHOs (Fig. 1E, \* $p < 0.05$ , \*\* $p < 0.01$ ).  
292 These data indicate that SEMA4C is upregulated in a subset of osteosarcoma tissues  
293 and cell lines compared to normal osteoblasts.

294

## 295 **Overexpression of *SEMA4C* promotes facets of cellular transformation in** 296 **osteosarcoma cells**

297 To understand the SEMA4C-PLXNB2 signaling axis in osteosarcoma, we  
298 overexpressed *SEMA4C* in endogenous low expressing MG-63 and G-292 osteosarcoma

299 cell lines and confirmed by western blot (Fig. 2A). Overexpression of *SEMA4C* increased  
300 proliferation in both lines (Fig. 2B,  $*p < 0.05$ ,  $****p < 0.0001$ ). In a soft agar colony  
301 formation assay, overexpression of *SEMA4C* promoted modest increases in colony  
302 formation in both lines (Fig. 2C,  $*p < 0.05$ ,  $****p < 0.0001$ ). Interestingly, in a transwell  
303 migration assay, *SEMA4C*-overexpressing MG-63 cells had increased migration while G-  
304 292 cells displayed slightly reduced migration (Fig. 2D,  $***p < 0.001$ ,  $****p < 0.0001$ ).  
305 Representative images of the migration experiments are shown in Fig. 2E. Both MAPK  
306 and PI3K signaling were investigated following phenotypic assays. These changes in  
307 proliferation, migration, and colony formation were associated with increased activation  
308 of AKT signaling, but not ERK signaling (data not shown) (Fig. 2F). Lastly, overexpression  
309 of *SEMA4C* significantly promoted upregulation of mesenchymal markers *SNAI1*, *SNAI2*,  
310 and *TWIST1* in MG-63 cells, while all but *TWIST1* remained largely unchanged in G-292  
311 (Fig. 2G,  $*p < 0.05$ ,  $****p < 0.0001$ ). These data suggest that overexpression of *SEMA4C*  
312 promotes facets of cellular transformation and mesenchymal marker expression.

313

### 314 **Knockdown of *SEMA4C* reduces cellular proliferation and colony formation**

315 To complement our gain-of-function (GOF) studies and to elucidate the effects of  
316 knockdown of *SEMA4C* on cellular proliferation and anchorage-independent growth, we  
317 performed loss-of-function (LOF) experiments in two endogenously high *SEMA4C*-  
318 expressing lines (See Figs. 1D and 1E). HOS and SJSA-1 osteosarcoma cell lines were  
319 transduced with shRNAs against *SEMA4C* (sh*SEMA4C* or sh*S4C* abbreviated) or non-  
320 silencing control (shCON) and stably selected with puromycin. Confirmation of optimal  
321 shRNA knockdown was evaluated via qRT-PCR (Fig. 3A,  $**p < 0.01$ ,  $****p < 0.0001$ ) and

322 western blot (Fig. 3B). Following evaluation, shRNA #2 was chosen for both lines in all  
323 subsequent experiments. Knockdown of SEMA4C reduced cellular proliferation (Fig. 3C,  
324 \*\*\*\* $p < 0.0001$ ) and colony formation (Fig. 3D, \*\*\*\* $p < 0.0001$ ) in both lines. These  
325 reductions in 2D and 3D growth were accompanied by downregulation of activated AKT  
326 signaling (Fig. 3E). Lastly, silencing of SEMA4C was associated with G1 cell cycle delay  
327 in both lines (Fig. 3F, \* $p < 0.05$ , \*\* $p < 0.01$ ). Silencing of SEMA4C did not induce cleaved  
328 CASP3 activity (Supp. Figs. 2A and 2B). Together, these data suggest SEMA4C  
329 modulates cellular growth and colony formation in osteosarcoma cell lines.

330

### 331 **SEMA4C promotes cellular motility and loss of adhesion**

332 Next, we examined the role of SEMA4C in cellular movement using migration  
333 chambers, wound healing assays, and 3D microfluidic chambers. Knockdown  
334 shSEMA4C lines displayed reduced cellular migration (Figs. 4A, \*\* $p < 0.01$ , \*\*\*\* $p <$   
335  $0.0001$ ). Representative migration images are shown in Fig. 4B. Following the migration  
336 assay, we evaluated cellular adhesion and invasion using 3D microfluidic chambers (Figs.  
337 4C and 4D and Supp Figs. 3A-D). Increased adhesion was observed in HOS, but not  
338 SJSA-1 cells (Fig. 4C, \* $p < 0.05$ ). Representative images 24 hours post are depicted in  
339 Fig. 4D. No changes in invasion were observed in either HOS or SJSA-1 knockdown cells  
340 (data not shown). Similarly, SJSA-1 knockdown cells showed reduced wound closure  
341 rates while a non-significant trend towards reduced closure rates was observed in HOS  
342 (Fig. 4E,  $p = 0.06$ , \* $p < 0.05$ ). Representative wound healing photographs are shown in  
343 Supp. Fig. 4A. These changes in cell motility were associated with reductions in  
344 expression of mesenchymal markers *SNAI1*, *SNAI2*, and *TWIST1* in both knockdown

345 lines (Fig. 4F,  $***p < 0.001$ ,  $****p < 0.0001$ ). Together, these data suggest SEMA4C  
346 promotes cellular motility and loss of adhesion in osteosarcoma cell lines.

347

### 348 **SEMA4C knockdown reduces tumor growth and development of lung metastases**

349       Next, we evaluated the effects of SEMA4C knockdown on osteosarcoma tumor  
350 growth and lung metastasis in an orthotopic mouse model. Following injection of either  
351 shCON or shSEMA4C knockdown cells into the calcaneus of immunodeficient mice,  
352 tumors were allowed to form, and caliper measurements were taken beginning 10 days  
353 post-implantation and every 5 days for 30 days. Both HOS and SJSA-1 knockdown cell  
354 lines displayed reduced tumor growth (Fig. 5A,  $*p < 0.05$ ,  $***p < 0.001$ ,  $****p < 0.0001$ ).  
355 Representative gross images of lungs from HOS shCON and shSEMA4C mice are shown  
356 in Fig. 5B. Visible macrometastatic nodules are indicated by white arrows. Whole cell  
357 lysates were made from two representative control and knockdown tumors from each cell  
358 line. SEMA4C knockdown was confirmed *in vivo* and activated AKT signaling also  
359 reduced in SEMA4C knockdown tumors (Fig. 5C). These results mirrored that of our GOF  
360 and LOF *in vitro* studies in Fig. 2F and Fig. 3F respectively. Considering metastatic  
361 capacity is often associated with increased cell growth, motility, and anchorage-  
362 independence [28, 29], we investigated the effects of SEMA4C knockdown on lung  
363 nodule formation and size. When lung sections were examined, both SEMA4C  
364 knockdown lines had reduced numbers of micrometastatic nodules (Fig. 5D,  $****p <$   
365  $0.0001$ ) and nodule area (Fig. 5E,  $****p < 0.0001$ ). Representative lung H & E images and  
366 high powered-insets are shown in Fig. 5F for both cell lines. Black arrows indicate

367 micrometastases. Together, SEMA4C promotes tumor growth and lung metastasis  
368 formation in osteosarcoma.

369

### 370 **Monoclonal antibody blockade of SEMA4C reduces tumorigenic properties of** 371 **osteosarcoma cell lines**

372       Lastly, we sought to evaluate the therapeutic potential of SEMA4C blockade using  
373 a commercially available monoclonal antibody raised against amino acids 400-510 of  
374 human SEMA4C. To evaluate the effects of blockade *in vitro*, we treated wild-type normal  
375 human osteoblasts (NHO), HOS, and SJSA-1 osteosarcoma cells with two concentrations  
376 of anti-SEMA4C or isotype control IgG and assayed its effects on cellular proliferation.  
377 Reduced cellular proliferation was observed following a 48-hour treatment in both  
378 osteosarcoma cell lines, but not NHOs (Fig. 6A, \*\*\*\* $p < 0.0001$ ). Similarly, treatment with  
379 anti-SEMA4C also reduced migration in both osteosarcoma cell lines (Fig. 6B, \*\*\*\* $p <$   
380  $0.0001$ ). Representative images are shown in Fig. 6C. Following treatment, G1 cell cycle  
381 delay was again observed similar to our genetic studies in both cell lines (Fig. 6D, \* $p <$   
382  $0.05$ , \*\* $p < 0.01$ , \*\*\* $p < 0.001$ , \*\*\*\* $p < 0.0001$ ). Our findings suggest that anti-SEMAC  
383 treatment may prove valuable for combating osteosarcoma tumor growth, progression,  
384 and ultimately lung metastasis through disruption of oncogenic SEMA4C signaling (Fig.  
385 6E).

386

## 387 **4. Discussion**

388       Our studies provide several new insights into the functions of the semaphorin 4C  
389 (SEMA4C) signaling pathway promoting osteosarcoma progression and metastasis.



390 SEMA4C has been shown to be highly expressed relative to control tissues and cell lines.  
391 Its heightened expression and signaling through its cognate receptor PLXNB2 correlates  
392 to patient outcomes in some solid cancers [30]. Our results demonstrate high level  
393 cytoplasmic/membraneous SEMA4C expression in malignant primary patient tissues  
394 which suggests SEMA4C is targetable on the cell surface. Activation of PLXNB2 signaling  
395 by its ligand SEMA4C is likely to occur via autocrine mechanisms in co-expressing tumor  
396 cells and via paracrine signaling when PLXNB2 is stimulated from SEMA4C-producing  
397 cells in the microenvironment. Our study demonstrates that both normal osteoblasts and  
398 osteosarcoma cell lines indeed express both soluble SEMA4C and cognate receptor  
399 PLXNB2, but interestingly membrane-bound SEMA4C was only found to be detectable in  
400 osteosarcoma cell lines. This data supports both autocrine and paracrine capabilities, but  
401 at an exaggerated level similar to previous findings in tumor-associated lymphatic  
402 endothelial cells and breast cancer [14, 27]. These elevated levels suggest that  
403 osteosarcoma cells are also genetically and phenotypically distinct from that of their  
404 normal counterparts.

405         Accumulating evidence suggests that SEMA4C-PLXNB2 interactions can promote  
406 an oncogenic signaling axis. Recent reports from Gurrupu et al. and Le et al. established  
407 that SEMA4C-PLXNB2 signaling promotes cancer cell proliferation, migration, and  
408 tumorigenesis in breast and glioma tumor cells respectively [14, 16]. In our study, we  
409 demonstrated that SEMA4C directs both 2D and 3D growth *in vitro* as well as modulates  
410 invasive cell motility and adhesion in osteosarcoma. These phenotypes were associated  
411 with large perturbations in activated AKT signaling. In particular, genetic silencing of  
412 SEMA4C induced G1 cell cycle delay, which has been well-established and linked with

413 changes in PI3K pathway signaling [31]. These *in vitro* findings were further substantiated  
414 by our mouse studies. We injected two SEMA4C knockdown cell lines into mice using a  
415 highly relevant orthotopic mouse model of osteosarcoma [24, 25]. SEMA4C knockdown  
416 tumor cells exhibited reduced tumor growth, micrometastatic nodule formation, and area.  
417 These data indicate a diverse role for SEMA4C in osteosarcoma growth, metastasis, and  
418 maintenance.

419         Among the family of SEMA4 members, several recent reports have demonstrated  
420 that SEMA4C also regulates EMT [32, 33]. While this phenomenon has been well-  
421 established in cancers of epithelial origin [34], the precise and novel roles EMT factors  
422 play in a characteristically mesenchymal cancer such as osteosarcoma, remain to be  
423 determined. In agreement with other reports in controlling EMT [32, 33], our results  
424 suggest high level SEMA4C expression promotes invasive cell motility, is associated with  
425 mesenchymal marker expression, and can be reversed through genetic disruption.  
426 Excitingly, TWIST1 was significantly altered in both of our SEMA4C gain-of-function  
427 (GOF) and loss-of-function (LOF) studies. Research from Yin and colleagues suggests  
428 TWIST1 is associated with poor prognoses in osteosarcoma and can be used as a  
429 prognostic indicator of metastatic potency in patients [35]. Moreover, in a study of 206  
430 unique bone tumors, TWIST1 expression was one of three markers in a panel that  
431 afforded the most sensitive and specific diagnostic utility among varied bone tumor types  
432 [36]. TWIST1 is also essential for tumor initiation and maintaining a mesenchymal state  
433 in synovial sarcomas [37]. Reactivation of TWIST1 can also promote metastasis in other  
434 sarcomas such as Ewing's sarcoma [38]. The continued demonstration of the plasticity of  
435 TWIST1 and other mesenchymal markers in maintaining phenotypes associated with

436 many aspects of osteosarcomagenesis, progression, and metastasis has led to the  
437 central belief of skeletal cancer stem cells [39, 40], of which have been just recently  
438 identified [41]. High level expression of SEMA4C may help facilitate a hyper-  
439 mesenchymal state in osteosarcoma and/or even allow a plasticity that contributes to  
440 many of the phenotypes our study illustrates, including wound healing [42], cellular  
441 adhesion [43], tumor growth, and metastasis [44].

442         The findings of our work may be highly relevant to the clinical setting. To date,  
443 metastases to the lungs remains the number one cause of osteosarcoma-related death  
444 [45]. Our monoclonal antibody blockade studies support the concept of targeting  
445 SEMA4C therapeutically. Targeted blockade of SEMA4C-induced signaling appreciably  
446 slowed tumor cell proliferation and migration *in vitro*. These phenotypic changes were  
447 again accompanied by G1 cell cycle delay. Together, these data suggest a rationale for  
448 SEMA4C blockade as a potential novel treatment option for patients with metastatic  
449 osteosarcoma. Recent studies on SEMA4D, a type IV semaphorin member that can also  
450 signal through PLXNB2 [46], suggests high level expression restricts tumoricidal immune  
451 cells from entering the tumor microenvironment and blunts their activity, however,  
452 monoclonal antibody neutralization by an anti-Sema4d antibody (murine: mAb67-2,  
453 human: VX15/2503; Vaccinex, Inc.) could restore these deficits in combination with anti-  
454 CtlA-4 or anti-Pd-1 checkpoint blockade [47-49]. Likewise, antibody targeting of SEMA4C  
455 could be highly advantageous for these same reasons and others we posit here. This  
456 could allow expansion of the poor portfolio of therapies available to metastatic  
457 osteosarcoma patients and may also be applied to other cancer types in which high  
458 SEMA4C expression is clinically relevant.

459           SEMA4C positive tumor cells are an attractive target therapeutically. These results  
460 suggest the possibility of SEMA4C as a novel therapeutic target for the treatment of  
461 incurable metastatic osteosarcoma.

462

## 463 **5. Acknowledgements**

464           The authors would like to thank Dr. Kyle Williams for helpful discussion throughout  
465 the study, Dr. Sterbs for her intoxicating enthusiasm during the preparation of this  
466 manuscript, Dr. Juan Abrahante for statistical advice, and the Clinical and Translational  
467 Science Institute (CSTI) Histology and Research Laboratory team members Dr. Colleen  
468 Forester and Lori Holm for tissue preparation and histology services. Author B.A.S. is  
469 supported by an NIH NIAMS T32 AR050938 Musculoskeletal Training Grant. Author  
470 E.J.P. is supported by an NIH NIAID T32 AI997313 Immunology Training Grant. This  
471 work was made possible through funding from the Sobiech Osteosarcoma Fund Award,  
472 Randy Shaver Cancer and Community Fund, University of Minnesota Foundation, Rein  
473 in Sarcoma Foundation, Aflac-AACR Career Development Award, and the Children's  
474 Cancer Research Fund to author B.S.M. Portions of this work were conducted in the  
475 Minnesota Nano Center, which is supported by the National Science Foundation through  
476 the National Nano Coordinated Infrastructure Network (NNCI) under Award Number  
477 ECCS-1542202.

478

## 479 **6. Authors' contributions**

480 Conception and design: B.A.S., D.A.L., B.S.M.

481 Development and acquisition of data: B.A.S, N.J.S., E.J.P. H.E.B., G.A.S., M.R.C., J.J.P.,  
482 G.M.D., K.L.B., E.P.R.

483 Analysis and interpretation: B.A.S., N.J.S., D.J.O., D.K.W. J.B.M., D.A.L, B.S.M.

484 Writing, review and revisions: B.A.S, N.J.S., E.J.P. H.E.B., G.A.S., M.R.C., J.J.P., G.M.D.,  
485 K.L.B., E.P.R., J.B.M., D.J.O., D.K.W., D.A.L., B.S.M

486 Study oversight: B.A.S., D.A.L., B.S.M

487

## 488 **7. Conflicts of interest**

489 All authors declare no conflicts of interest.

490

## 491 **8. References**

- 492 1. Morrow, J.J. and C. Khanna, *Osteosarcoma Genetics and Epigenetics: Emerging Biology*  
493 *and Candidate Therapies*. Crit Rev Oncog, 2015. **20**(3-4): p. 173-97.
- 494 2. Yan, G.N., Y.F. Lv, and Q.N. Guo, *Advances in osteosarcoma stem cell research and*  
495 *opportunities for novel therapeutic targets*. Cancer Lett, 2016. **370**(2): p. 268-74.
- 496 3. Gianferante, D.M., L. Mirabello, and S.A. Savage, *Germline and somatic genetics of*  
497 *osteosarcoma - connecting aetiology, biology and therapy*. Nat Rev Endocrinol, 2017.  
498 **13**(8): p. 480-491.
- 499 4. Rickel, K., F. Fang, and J. Tao, *Molecular genetics of osteosarcoma*. Bone, 2017. **102**: p.  
500 69-79.
- 501 5. Mirabello, L., R.J. Troisi, and S.A. Savage, *Osteosarcoma incidence and survival rates*  
502 *from 1973 to 2004: data from the Surveillance, Epidemiology, and End Results Program*.  
503 Cancer, 2009. **115**(7): p. 1531-43.
- 504 6. Alto, L.T. and J.R. Terman, *Semaphorins and their Signaling Mechanisms*. Methods in  
505 molecular biology (Clifton, N.J.), 2017. **1493**: p. 1-25.
- 506 7. Meyer, L.A., et al., *Current drug design to target the Semaphorin/Neuropilin/Plexin*  
507 *complexes*. Cell Adh Migr, 2016. **10**(6): p. 700-708.
- 508 8. Tamagnone, L., *Emerging role of semaphorins as major regulatory signals and potential*  
509 *therapeutic targets in cancer*. Cancer Cell, 2012. **22**(2): p. 145-52.
- 510 9. Worzfeld, T. and S. Offermanns, *Semaphorins and plexins as therapeutic targets*. Nat Rev  
511 Drug Discov, 2014. **13**(8): p. 603-21.
- 512 10. Negishi-Koga, T., et al., *Suppression of bone formation by osteoclastic expression of*  
513 *semaphorin 4D*. Nat Med, 2011. **17**(11): p. 1473-80.
- 514 11. Moriarity, B.S., et al., *A Sleeping Beauty forward genetic screen identifies new genes and*  
515 *pathways driving osteosarcoma development and metastasis*. Nat Genet, 2015. **47**(6): p.  
516 615-24.
- 517 12. Abarrategi, A., et al., *Osteosarcoma: Cells-of-Origin, Cancer Stem Cells, and Targeted*  
518 *Therapies*. Stem Cells Int, 2016. **2016**: p. 3631764.

- 519 13. Swiercz, J.M., T. Worzfeld, and S. Offermanns, *ErbB-2 and met reciprocally regulate*  
520 *cellular signaling via plexin-B1*. J Biol Chem, 2008. **283**(4): p. 1893-901.
- 521 14. Gurrapu, S., et al., *Sema4C/PlexinB2 signaling controls breast cancer cell growth,*  
522 *hormonal dependence and tumorigenic potential*. Cell Death Differ, 2018. **25**(7): p. 1259-  
523 1275.
- 524 15. Lu, J., et al., *MiR-205 suppresses tumor growth, invasion, and epithelial-mesenchymal*  
525 *transition by targeting SEMA4C in hepatocellular carcinoma*. Faseb j, 2018: p.  
526 fj201800113R.
- 527 16. Le, A.P., et al., *Plexin-B2 promotes invasive growth of malignant glioma*. Oncotarget,  
528 2015. **6**(9): p. 7293-304.
- 529 17. Paldy, E., et al., *Semaphorin 4C Plexin-B2 signaling in peripheral sensory neurons is*  
530 *pronociceptive in a model of inflammatory pain*. Nat Commun, 2017. **8**(1): p. 176.
- 531 18. Xue, D., et al., *Semaphorin 4C: A Novel Component of B-Cell Polarization in Th2-Driven*  
532 *Immune Responses*. Front Immunol, 2016. **7**: p. 558.
- 533 19. Rahrmann, E.P., et al., *Forward genetic screen for malignant peripheral nerve sheath*  
534 *tumor formation identifies new genes and pathways driving tumorigenesis*. Nat Genet,  
535 2013. **45**(7): p. 756-66.
- 536 20. Marko, T.A., et al., *Slit-Robo GTPase-Activating Protein 2 as a metastasis suppressor in*  
537 *osteosarcoma*. Sci Rep, 2016. **6**: p. 39059.
- 538 21. Moriarity, B.S., et al., *Simple and efficient methods for enrichment and isolation of*  
539 *endonuclease modified cells*. PLoS One, 2014. **9**(5): p. e96114.
- 540 22. Brett, M.E., et al., *In vitro elucidation of the role of pericellular matrix in metastatic*  
541 *extravasation and invasion of breast carcinoma cells*. Integr Biol (Camb), 2018. **10**(4): p.  
542 242-252.
- 543 23. Khanna, C., et al., *An orthotopic model of murine osteosarcoma with clonally related*  
544 *variants differing in pulmonary metastatic potential*. Clin Exp Metastasis, 2000. **18**(3): p.  
545 261-71.
- 546 24. Smeester, B.A., M. Al-Gizawiy, and A.J. Beitz, *Effects of different electroacupuncture*  
547 *scheduling regimens on murine bone tumor-induced hyperalgesia: sex differences and*  
548 *role of inflammation*. Evid Based Complement Alternat Med, 2012. **2012**: p. 671386.
- 549 25. Smeester, B.A., et al., *The effect of electroacupuncture on osteosarcoma tumor growth*  
550 *and metastasis: analysis of different treatment regimens*. Evid Based Complement  
551 Alternat Med, 2013. **2013**: p. 387169.
- 552 26. Faustino-Rocha, A., et al., *Estimation of rat mammary tumor volume using caliper and*  
553 *ultrasonography measurements*. Lab Anim (NY), 2013. **42**(6): p. 217-24.
- 554 27. Wei, J.C., et al., *Tumor-associated Lymphatic Endothelial Cells Promote Lymphatic*  
555 *Metastasis By Highly Expressing and Secreting SEMA4C*. Clin Cancer Res, 2017. **23**(1):  
556 p. 214-224.
- 557 28. Jiang, W.G., et al., *Tissue invasion and metastasis: Molecular, biological and clinical*  
558 *perspectives*. Semin Cancer Biol, 2015. **35 Suppl**: p. S244-s275.
- 559 29. Mori, S., et al., *Anchorage-independent cell growth signature identifies tumors with*  
560 *metastatic potential*. Oncogene, 2009. **28**(31): p. 2796-805.
- 561 30. Butti, R., et al., *Impact of semaphorin expression on prognostic characteristics in breast*  
562 *cancer*. Breast Cancer (Dove Med Press), 2018. **10**: p. 79-88.
- 563 31. García, Z., et al., *Phosphoinositide 3-kinase controls early and late events in mammalian*  
564 *cell division*. Embo j, 2006. **25**(4): p. 655-61.
- 565 32. Yang, Q., et al., *MiR-125b regulates epithelial-mesenchymal transition via targeting*  
566 *Sema4C in paclitaxel-resistant breast cancer cells*. Oncotarget, 2015. **6**(5): p. 3268-79.
- 567 33. Zhou, Q.D., et al., *Erbin interacts with Sema4C and inhibits Sema4C-induced epithelial-*  
568 *mesenchymal transition in HK2 cells*. J Huazhong Univ Sci Technolog Med Sci, 2013.  
569 **33**(5): p. 672-679.

- 570 34. Roche, J., *The Epithelial-to-Mesenchymal Transition in Cancer*. Cancers (Basel), 2018.  
571 **10**(2).
- 572 35. Yin, K., et al., *Prognostic value of Twist and E-cadherin in patients with osteosarcoma*.  
573 *Med Oncol*, 2012. **29**(5): p. 3449-55.
- 574 36. Horvai, A.E., et al., *Regulators of skeletal development: a cluster analysis of 206 bone*  
575 *tumors reveals diagnostically useful markers*. *Mod Pathol*, 2012. **25**(11): p. 1452-61.
- 576 37. Lee, K.W., et al., *Twist1 is essential in maintaining mesenchymal state and tumor-initiating*  
577 *properties in synovial sarcoma*. *Cancer Lett*, 2014. **343**(1): p. 62-73.
- 578 38. Choo, S., et al., *Reactivation of TWIST1 contributes to Ewing sarcoma metastasis*. *Pediatr*  
579 *Blood Cancer*, 2018. **65**(1).
- 580 39. Leder, K., E.C. Holland, and F. Michor, *The therapeutic implications of plasticity of the*  
581 *cancer stem cell phenotype*. *PLoS One*, 2010. **5**(12): p. e14366.
- 582 40. Poleszczuk, J. and H. Enderling, *Cancer Stem Cell Plasticity as Tumor Growth Promoter*  
583 *and Catalyst of Population Collapse*. *Stem Cells Int*, 2016. **2016**: p. 3923527.
- 584 41. Chan, C.K.F., et al., *Identification of the Human Skeletal Stem Cell*. *Cell*, 2018. **175**(1): p.  
585 43-56.e21.
- 586 42. Lamouille, S., J. Xu, and R. Derynck, *Molecular mechanisms of epithelial-mesenchymal*  
587 *transition*. *Nat Rev Mol Cell Biol*, 2014. **15**(3): p. 178-96.
- 588 43. Kumar, S., A. Das, and S. Sen, *Extracellular matrix density promotes EMT by weakening*  
589 *cell-cell adhesions*. *Mol Biosyst*, 2014. **10**(4): p. 838-50.
- 590 44. Ye, X. and R.A. Weinberg, *Epithelial-Mesenchymal Plasticity: A Central Regulator of*  
591 *Cancer Progression*. *Trends Cell Biol*, 2015. **25**(11): p. 675-686.
- 592 45. Meazza, C. and P. Scanagatta, *Metastatic osteosarcoma: a challenging multidisciplinary*  
593 *treatment*. *Expert Rev Anticancer Ther*, 2016. **16**(5): p. 543-56.
- 594 46. Deng, S., et al., *Plexin-B2, but not Plexin-B1, critically modulates neuronal migration and*  
595 *patterning of the developing nervous system in vivo*. *J Neurosci*, 2007. **27**(23): p. 6333-  
596 47.
- 597 47. Clavijo, P.E., et al., *Semaphorin4D inhibition improves response to immune checkpoint*  
598 *blockade via attenuation of MDSC recruitment and function*. *Cancer Immunol Res*, 2018.
- 599 48. Evans, E.E., et al., *Antibody Blockade of Semaphorin 4D Promotes Immune Infiltration*  
600 *into Tumor and Enhances Response to Other Immunomodulatory Therapies*. *Cancer*  
601 *Immunol Res*, 2015. **3**(6): p. 689-701.
- 602 49. Evans, E.E., et al., *Immunomodulation of the tumor microenvironment by neutralization of*  
603 *Semaphorin 4D*. *Oncoimmunology*, 2015. **4**(12): p. e1054599.
- 604

## 605 **9. Figure legends**

606 **Fig. 1 SEMA4C is upregulated in a subset of osteosarcoma tissue samples and cell**  
607 **lines**

608 **A.** Relative *SEMA4C* RNA expression levels in normal human osteoblasts (n = 3)  
609 compared to osteosarcoma patient samples (n = 12). Data shown are fold change  
610 compared to osteoblasts  $\pm$  SEM; \* $p < 0.05$ ; unpaired Student's T-test. **B.** Summary of  
611 scores identified in human osteosarcoma TMA following staining with anti-SEMA4C. **C.**

612 Representative images of SEMA4C staining with each expression intensity and number  
613 of sections with indicated staining. Representative images are shown at 20X; insets are  
614 40X. Scale bars = 25 and 50  $\mu\text{m}$  where indicated. **D.** Western blots of SEMA4C and  
615 cognate receptor PLXNB2 expression in normal human osteoblasts (NHO) and  
616 osteosarcoma cell lines. **E.** ELISA analysis of soluble SEMA4C expression in NHOs and  
617 osteosarcoma cell supernatants. Data shown as mean  $\pm$  SEM (n = 2/group); \* $p$  < 0.05,  
618 \*\* $p$  < 0.01; One-way ANOVA.

619

620 **Fig. 2 SEMA4C overexpression promotes increased cellular growth, colony**  
621 **formation, and migration in osteosarcoma cell lines**

622 **A.** Western blots confirming overexpression of SEMA4C. **B.** SEMA4C overexpression  
623 increases the proliferation of osteosarcoma cell lines. Data shown as fold change  $\pm$  SEM  
624 (n = 18/group); \* $p$  < 0.05, \*\*\*\* $p$  < 0.0001; Two-way ANOVA. **C.** SEMA4C overexpression  
625 promotes anchorage-independent growth. Data as fold change  $\pm$  SEM (n = 36/group); \* $p$   
626 < 0.05, \*\*\*\* $p$  < 0.0001; unpaired Student's T-tests. **D.** SEMA4C overexpression  
627 modulates migration. Data as fold change  $\pm$  SEM (n = 12/group); \*\*\* $p$  < 0.001, \*\*\*\* $p$  <  
628 0.0001; unpaired Student's T-tests. **E.** Representative images of cellular migration. **F.**  
629 Western blots of activated AKT signaling in SEMA4C-overexpressing cell lines. **G.**  
630 Relative expression of mesenchymal marker genes in cell lines  $\pm$  SEMA4C  
631 overexpression (n = 3/group); multiple Student's T-tests.

632

633 **Fig. 3 Knockdown of SEMA4C reduces cellular growth, colony formation, and**  
634 **promotes cell cycle delay**



635 **A.** Confirmation of SEMA4C knockdown via qRT-PCR. Data shown as fold change  $\pm$  SEM  
636 (n = 3/group); \*\* $p < 0.01$ , \*\*\*\* $p < 0.0001$ ; One-way ANOVA. **B.** Western blots of SEMA4C  
637 in control shCON and shSEMA4C cell lines. **C.** Knockdown of SEMA4C reduces cellular  
638 proliferation. Data as fold change  $\pm$  SEM (n = 18/group); \*\*\*\* $p < 0.0001$ ; Two-way  
639 ANOVA. **D.** Colony formation in SEMA4C knockdown cell lines. Data as fold change  $\pm$   
640 SEM (n = 36/group); \*\*\*\* $p < 0.0001$ ; unpaired Student's T-test. **E.** Western blots of  
641 activated AKT signaling in SEMA4C knockdown cells. **F.** Silencing of SEMA4C induces  
642 G1 cell cycle delay; Data shown as number of cells  $\pm$  SEM (n = 3/group); Two-way  
643 ANOVA.

644

645 **Fig. 4 SEMA4C knockdown reduces cell motility, promotes adhesion, and**  
646 **downregulates mesenchymal marker expression**

647 **A.** Knockdown of SEMA4C reduces cellular migration. Data as fold change  $\pm$  SEM (n =  
648 12/group); \*\* $p < 0.01$ , \*\*\*\* $p < 0.0001$ ; unpaired Student's T-test. **B.** Representative  
649 cellular migration images in knockdown cell lines. **C.** Silencing of SEMA4C increases  
650 cellular adhesion in HOS cells (n = 5-6/group); \* $p < 0.05$ ; unpaired Student's T-test. **D.**  
651 Representative images of cellular adhesion 24 hours post. **E.** Wound closure rate in  
652 SEMA4C-deficient cells (n = 36/group); \* $p < 0.05$ ; unpaired Student's T-test. **F.** qRT-PCR  
653 of mesenchymal markers. Data as fold change  $\pm$  SEM (n = 3/group); \*\*\* $p < 0.001$ , \*\*\*\* $p$   
654  $< 0.0001$ ; multiple Student's T-tests.

655

656 **Fig. 5 SEMA4C knockdown decreases osteosarcoma tumor growth and lung**  
657 **metastasis**

658 **A.** Tumor volume measurements in SEMA4C knockdown orthotopic injections. Data  
659 shown as mean volume in  $\text{mm}^3 \pm \text{SEM}$ ;  $*p < 0.05$ ,  $***p < 0.001$ ,  $****p < 0.0001$ ; Two-way  
660 ANOVA. **B.** Representative gross lung images from a HOS control and SEMA4C  
661 knockdown animal. White arrows indicate macrometastatic nodules. **C.** Western blot  
662 images in two control and SEMA4C knockdown animals from each cell line confirming  
663 SEMA4C knockdown and reductions in AKT signaling. **D.** Number of micrometastatic lung  
664 nodules/section. Data shown as mean number of nodules  $\pm \text{SEM}$  ( $n = 36/\text{group}$ );  $****p <$   
665  $0.0001$ ; unpaired Student's T-test. **E.** Area measurements of micrometastases in  
666 sections. Data shown as mean area  $\pm \text{SEM}$  ( $n = 36/\text{group}$ );  $****p < 0.0001$ ; unpaired  
667 Student's T-test. **F.** Representative H & E lung images are shown at 20X; insets are 40X.  
668 Black arrows indicate micrometastases, Scale bars = 100  $\mu\text{m}$ .

669

670 **Fig. 6 Anti-SEMA4C monoclonal antibody blockade is effective *in vitro***

671 **A.** SEMA4C antibody blockade reduces cellular growth following a 48-hour incubation in  
672 osteosarcoma cell lines only. Data as fold change  $\pm \text{SEM}$  ( $n = 18$ );  $****p < 0.0001$ ; One-  
673 way ANOVA. **B.** Antibody blockade reduces cellular migration. Data shown as fold  
674 change  $\pm \text{SEM}$  ( $n = 12$ );  $****p < 0.0001$ ; Student's T-test. **C.** Representative images of  
675 migration in isotype control IgG and anti-SEMA4C treated lines. **D.** Anti-SEMA4C  
676 treatment induces G1 cell cycle delay. Data shown as number of cells  $\pm \text{SEM}$  ( $n = 3$ );  $*p$   
677  $< 0.05$ ,  $**p < 0.01$ ,  $***p < 0.001$ ,  $****p < 0.0001$ ; Two-way ANOVA. **E.** Model of SEMA4C  
678 function. SEMA4C promotes downstream activation of AKT signaling which ultimately  
679 leads to upregulation of mesenchymal genes, promotion of cellular migration,  
680 proliferation, tumor growth, and metastasis. Monoclonal antibody blockade can effectively

681 inhibit these downstream events and induce cell cycle delay. S4C<sub>TM</sub> = transmembrane  
682 SEMA4C, S4C<sub>sol</sub> = soluble SEMA4C.

683

684 **Supp. Table 1**

685 Table of all antibodies used in manuscript.

686

687 **Supp. Table 2**

688 Table of primer sequences used in this manuscript.

689

690 **Supp. Fig. 1 Increased SEMA4C expression is associated with osteosarcoma**

691 **A.** Summary of the percent positive SEMA4C staining per section in a human  
692 osteosarcoma TMA. Data shown as number of samples with indicated percent staining in  
693 each of the four categories. **B.** Bar graph depicting percentage of SEMA4C staining  
694 localization (cytoplasmic/membraneous, nuclear, or both). SEMA4C staining was  
695 predominantly cytoplasmic/membraneous in sections.

696

697 **Supp. Fig. 2 Silencing of SEMA4C does not induce apoptosis**

698 **A.** Representative flow cytometry plots of cleaved CASP3 positivity (cCas3+) in SEMA4C  
699 knockdown cell lines. **B.** Quantification of flow cytometry plots. Data shown as mean area  
700  $\pm$  SEM (n = 3);  $p > 0.05$ ; unpaired Student's T-test.

701

702 **Supp. Fig. 3 Description of 3D microfluidic chambers and representative images**

703 **A.** An AutoCAD schematic of the entire device. **B.** Collagen (blue) is allowed to polymerize  
704 in the lower channel, then human umbilical vein endothelial cells (HUVECs, orange) are  
705 perfused through the adjacent channel. **C.** HUVECs are allowed to become confluent.  
706 Green fluorescent protein (GFP)-expressing cancer cells are perfused through the  
707 endothelial cell channel. **D.** Modified osteosarcoma cell lines adhere to the endothelium  
708 and may transmigrate and invade into the collagen.

709

710 **Supp. Fig. 4 Representative illustration of wound closure assay analysis**

711 **A.** Representative photo montages of phase contrast images of wound closure assays in  
712 cell lines  $\pm$  SEMA4C deficiency at indicated time points.

713

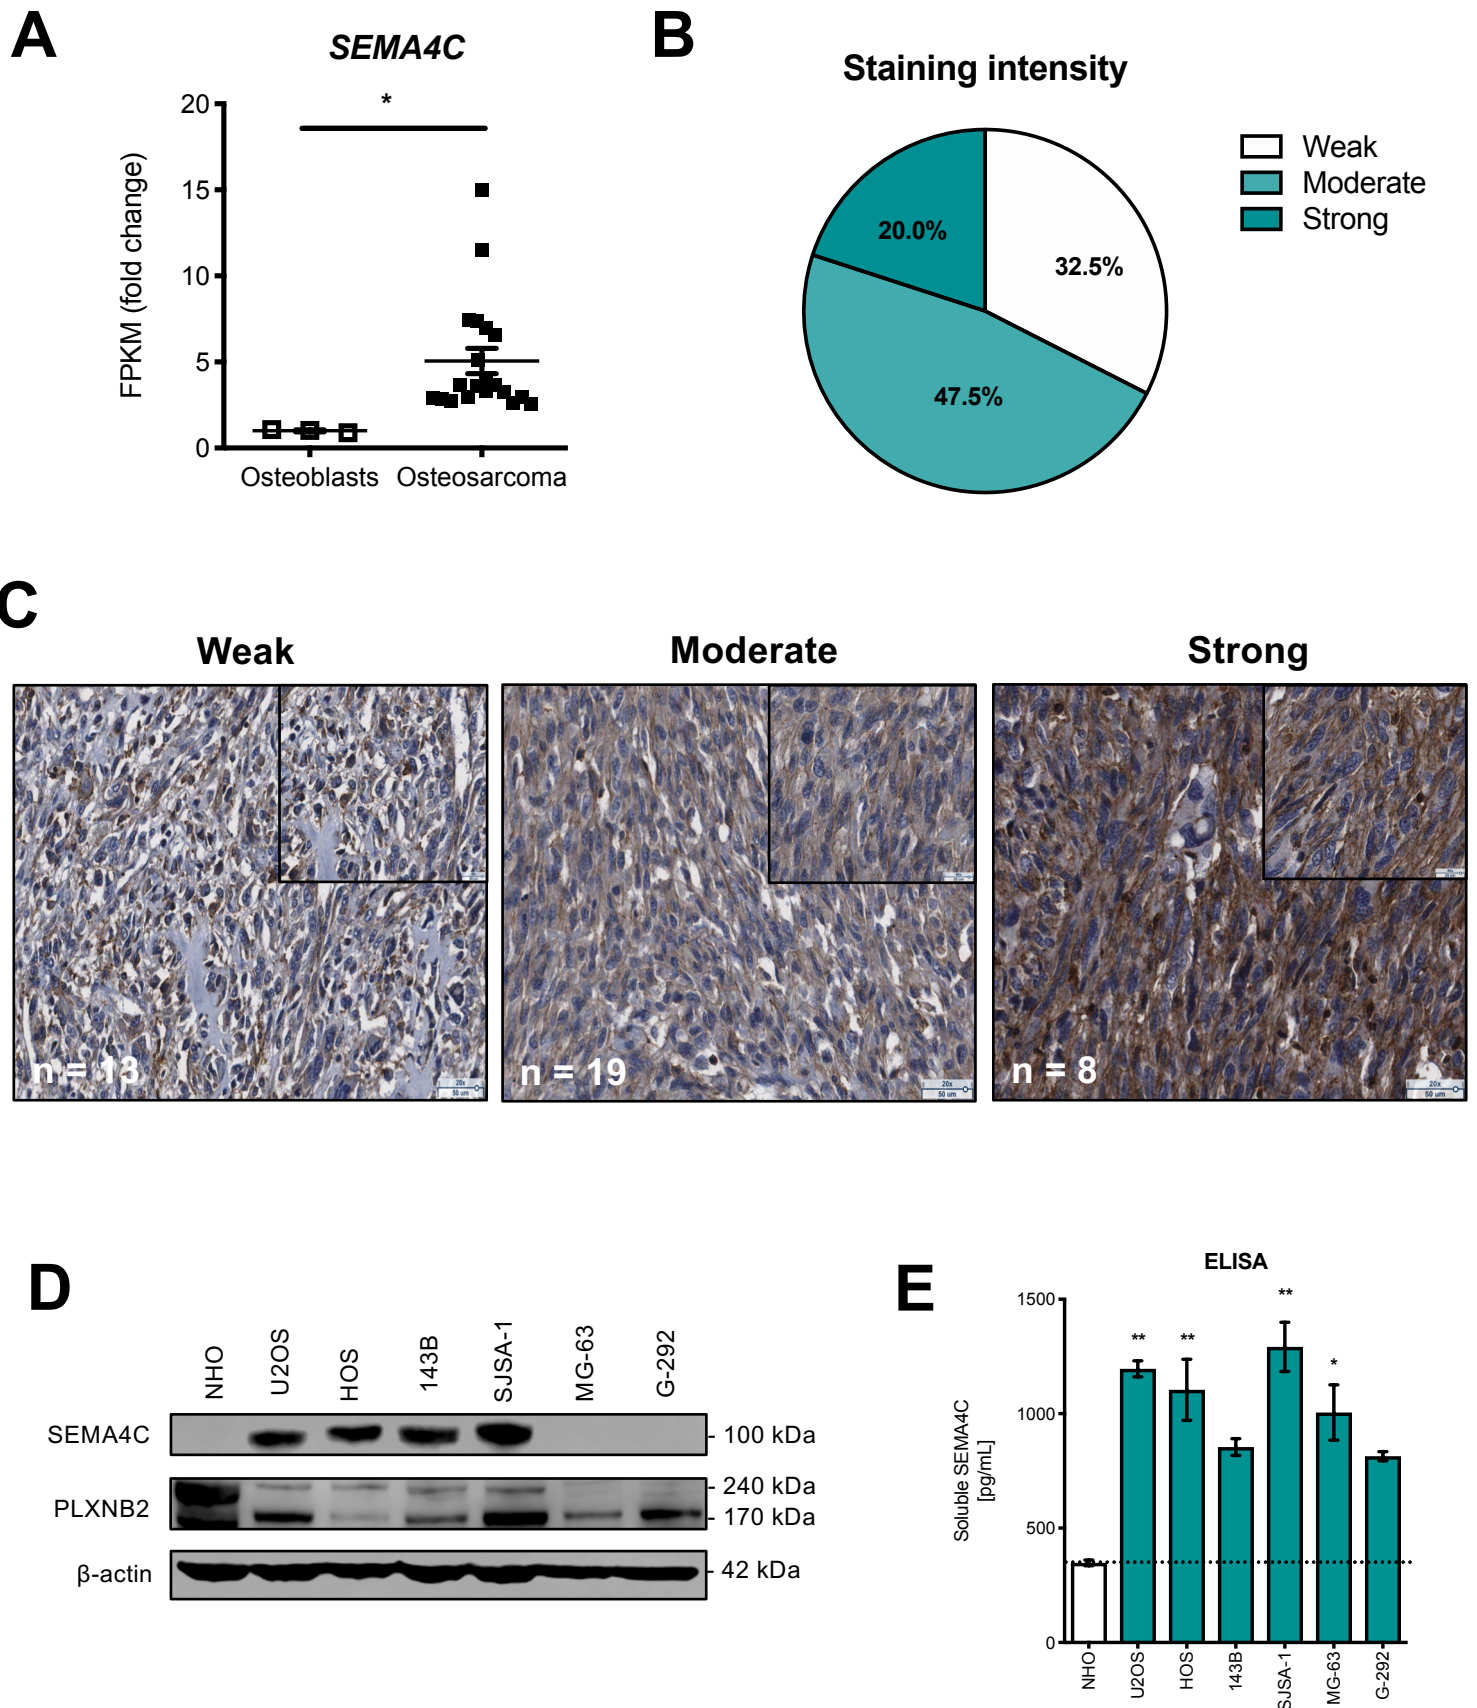

Fig. 1

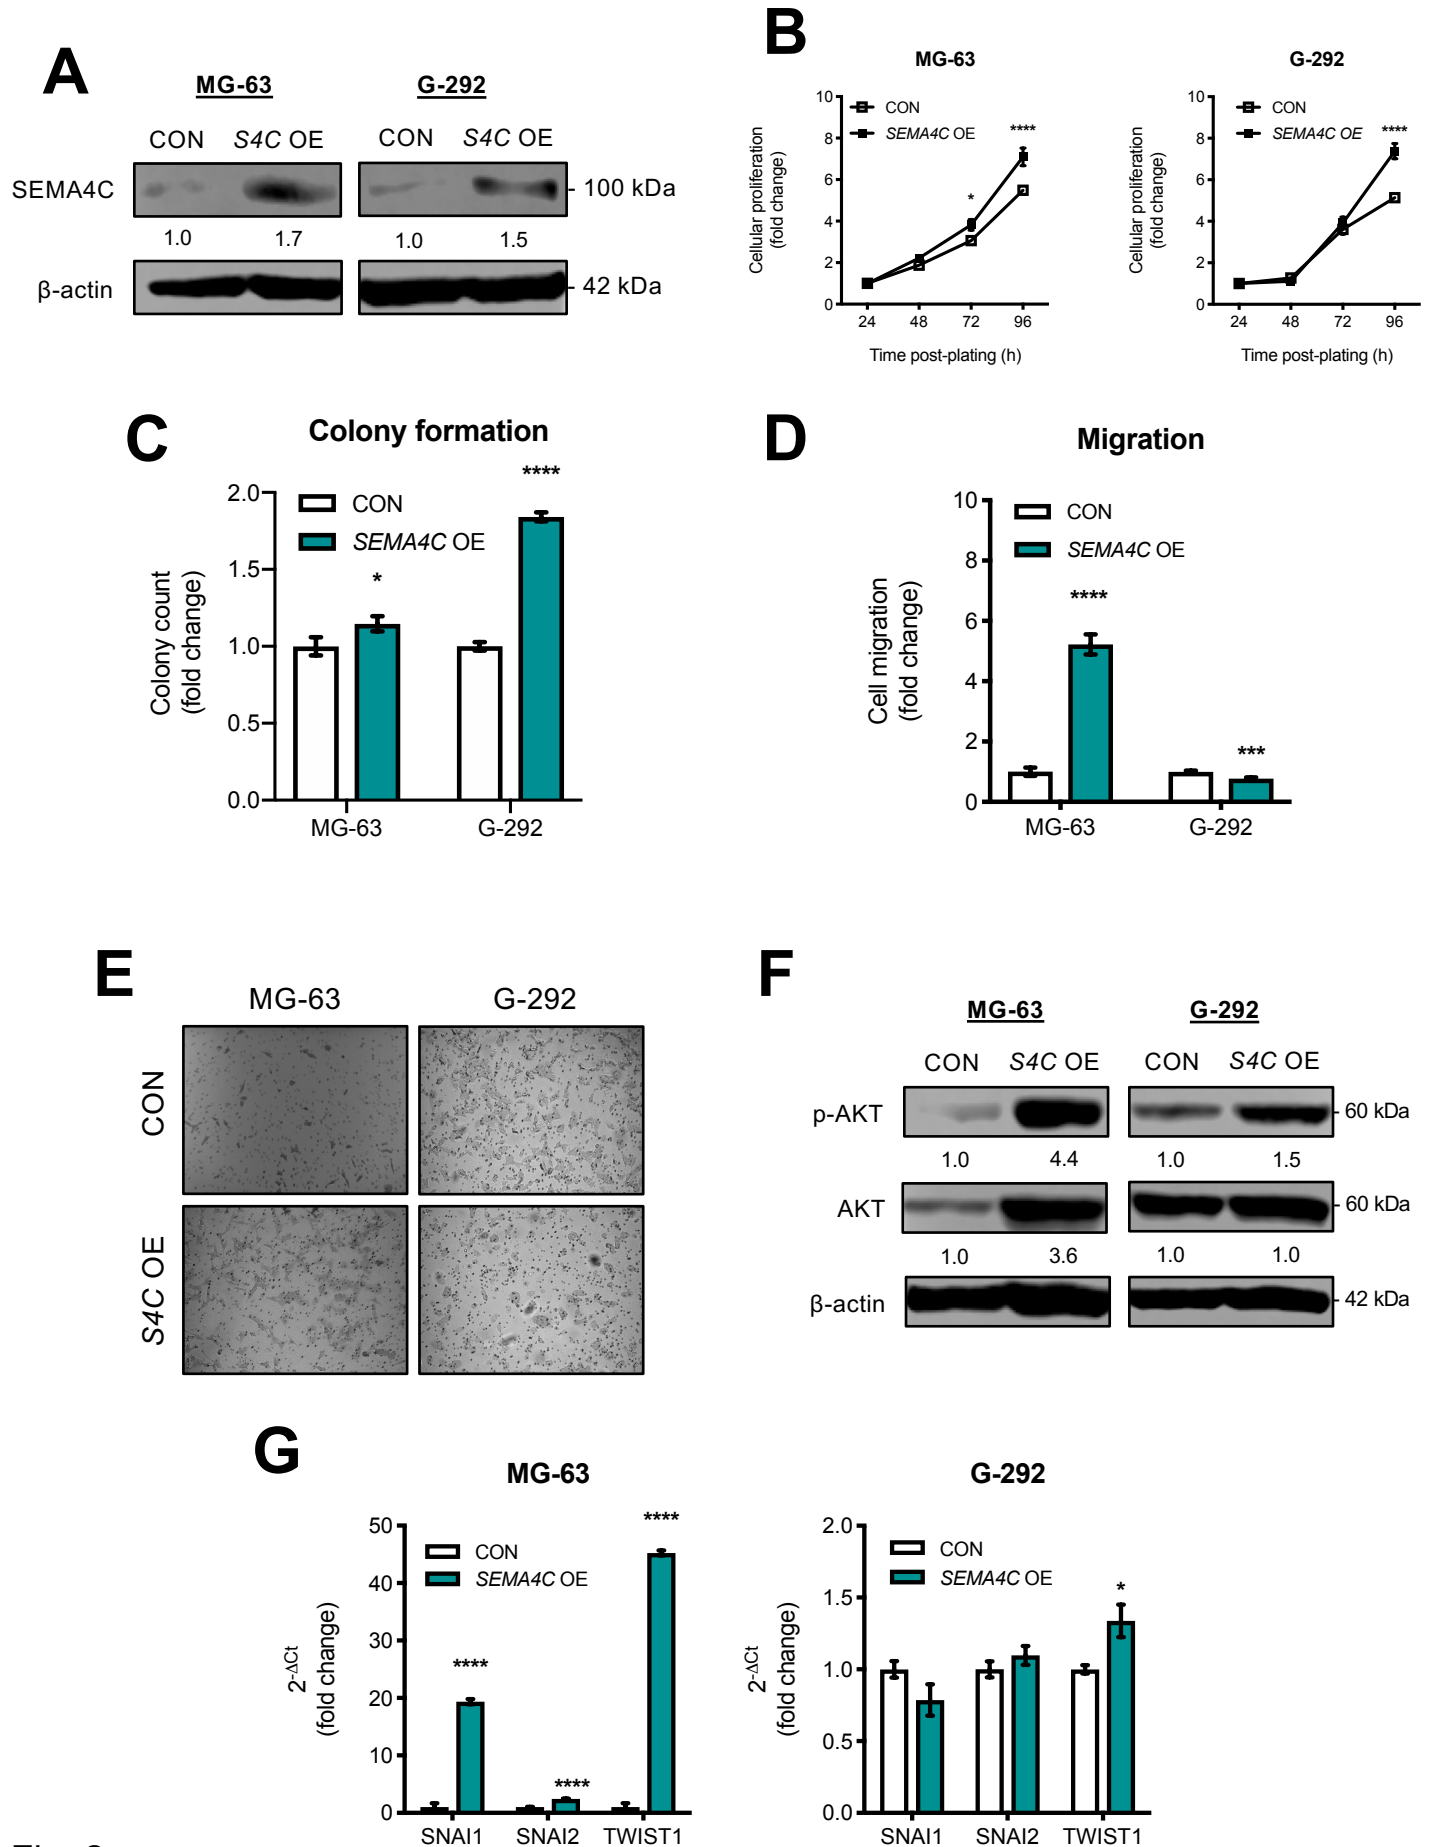

Fig. 2

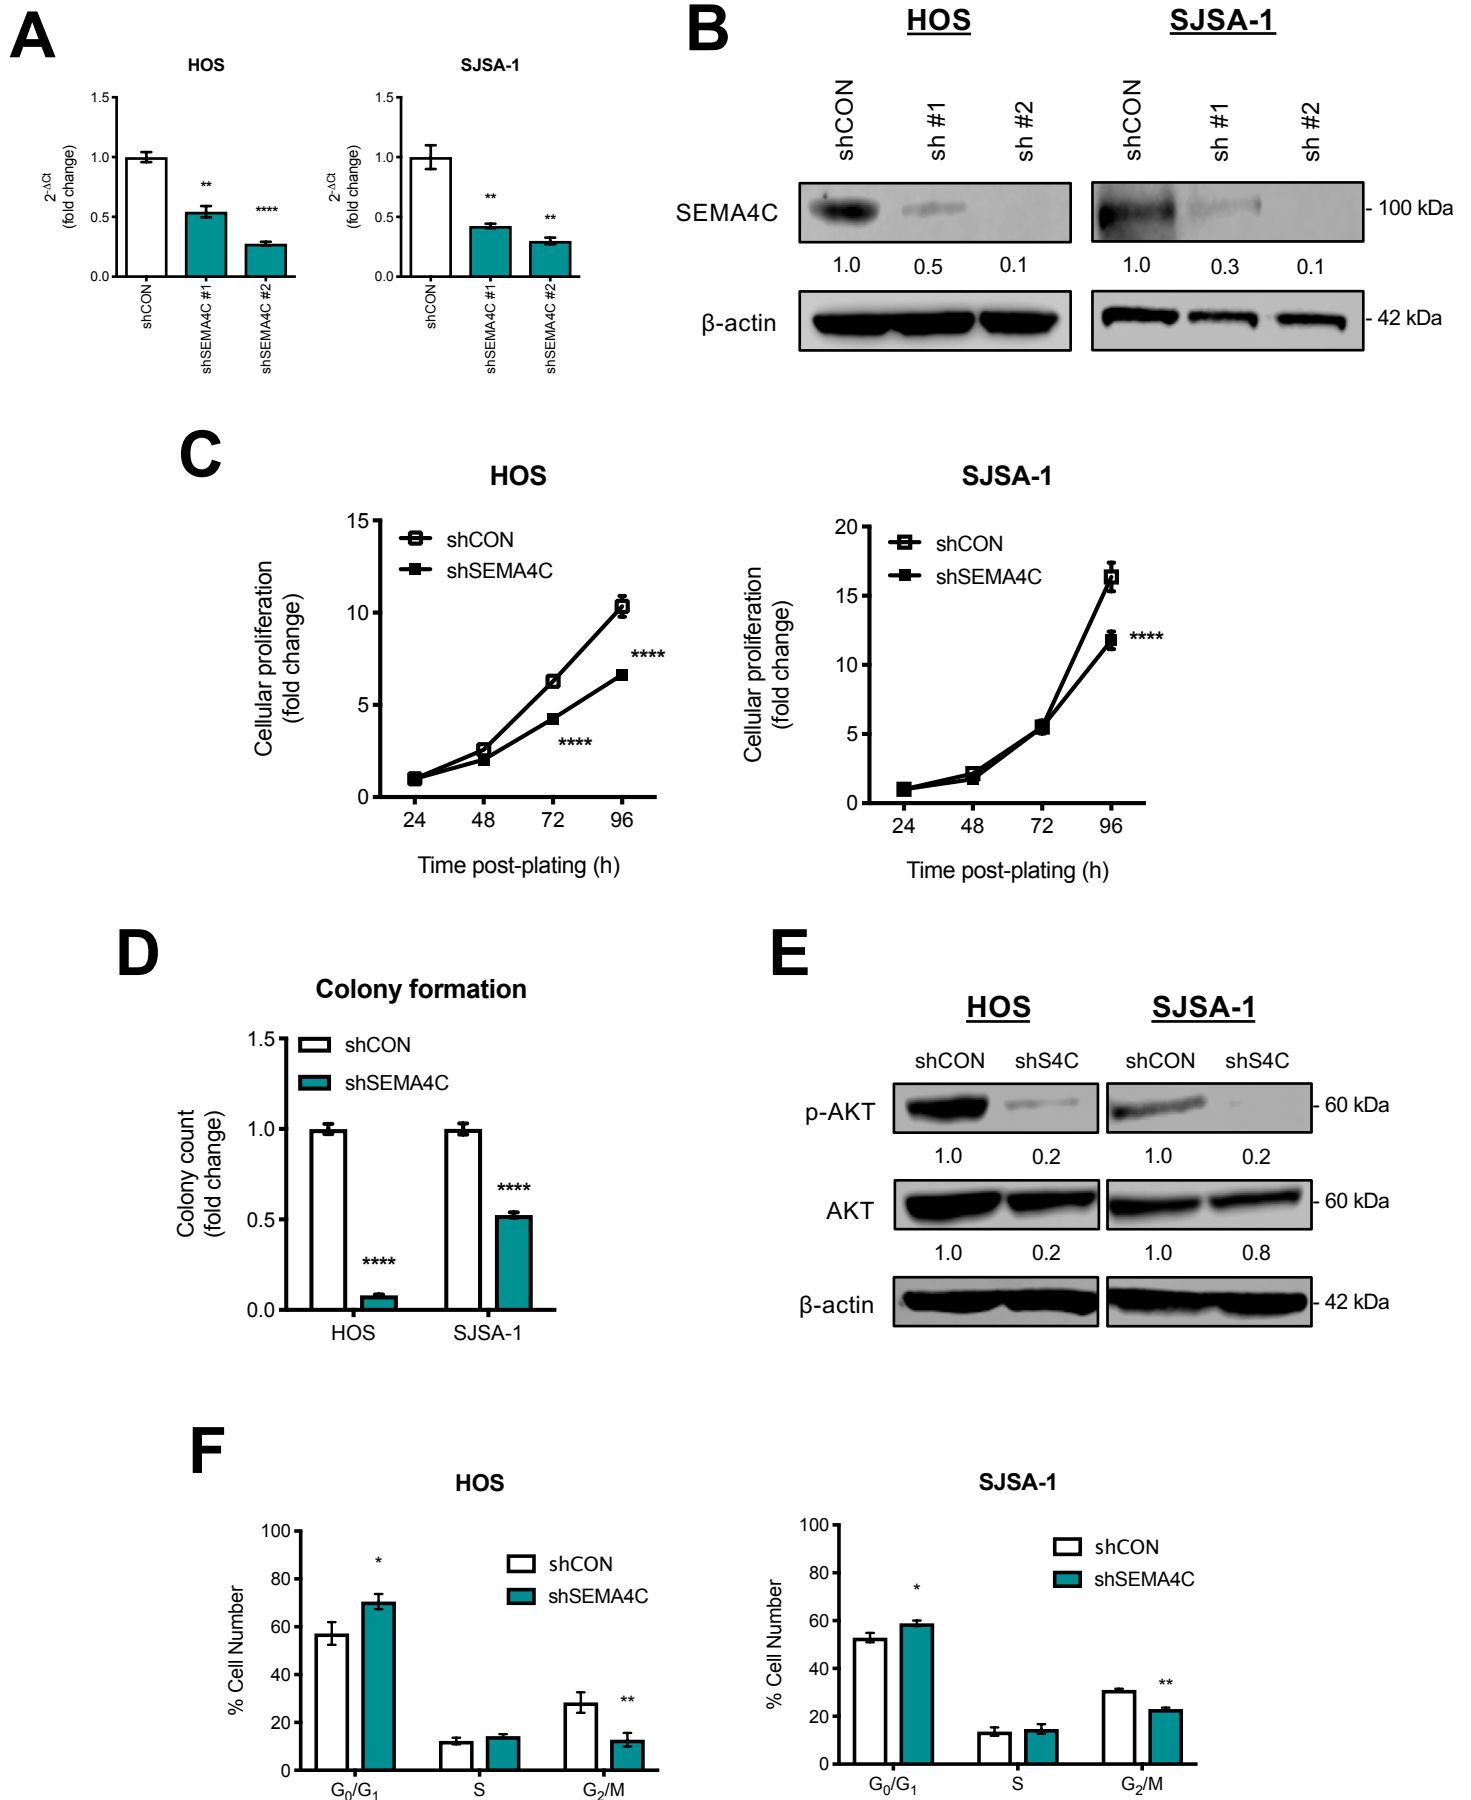

Fig. 3

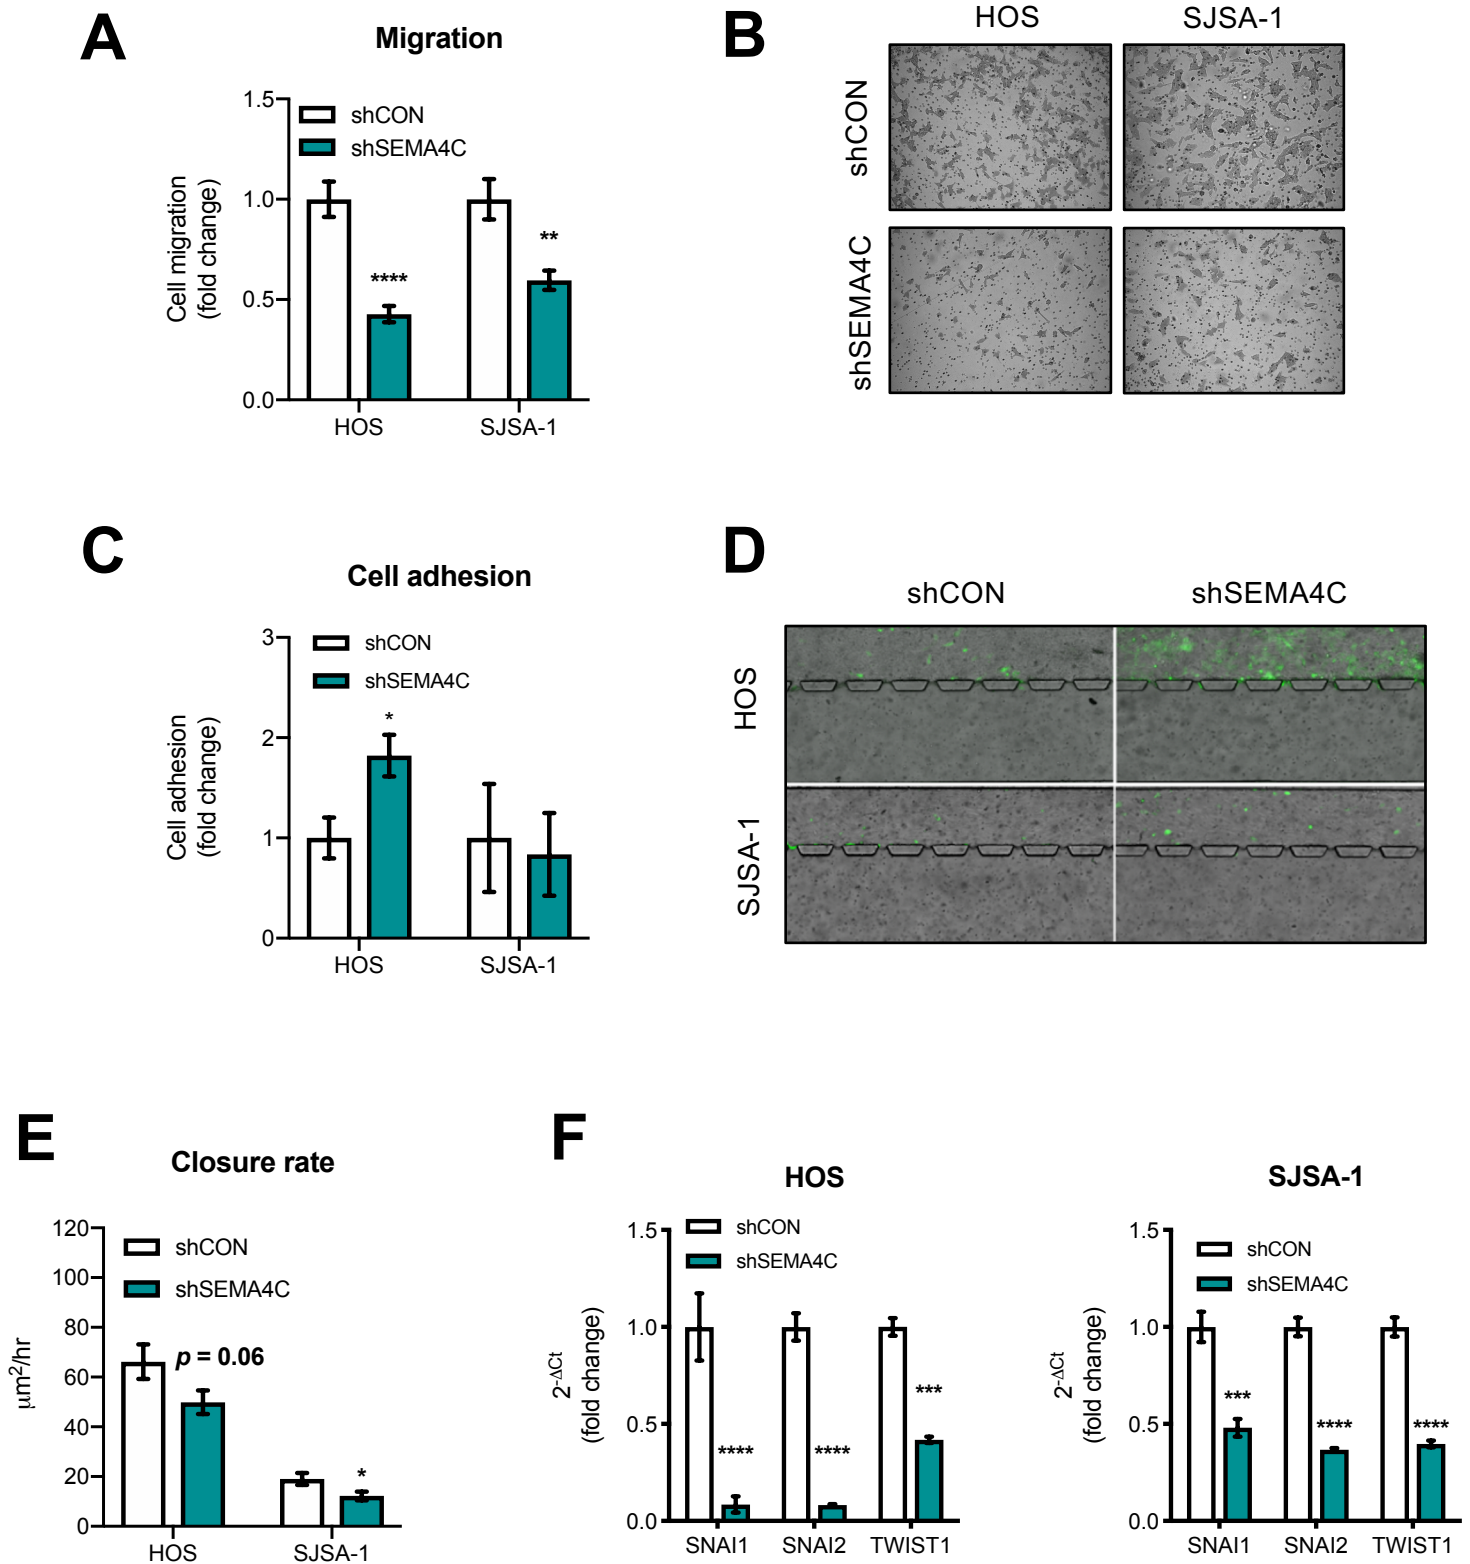

Fig. 4



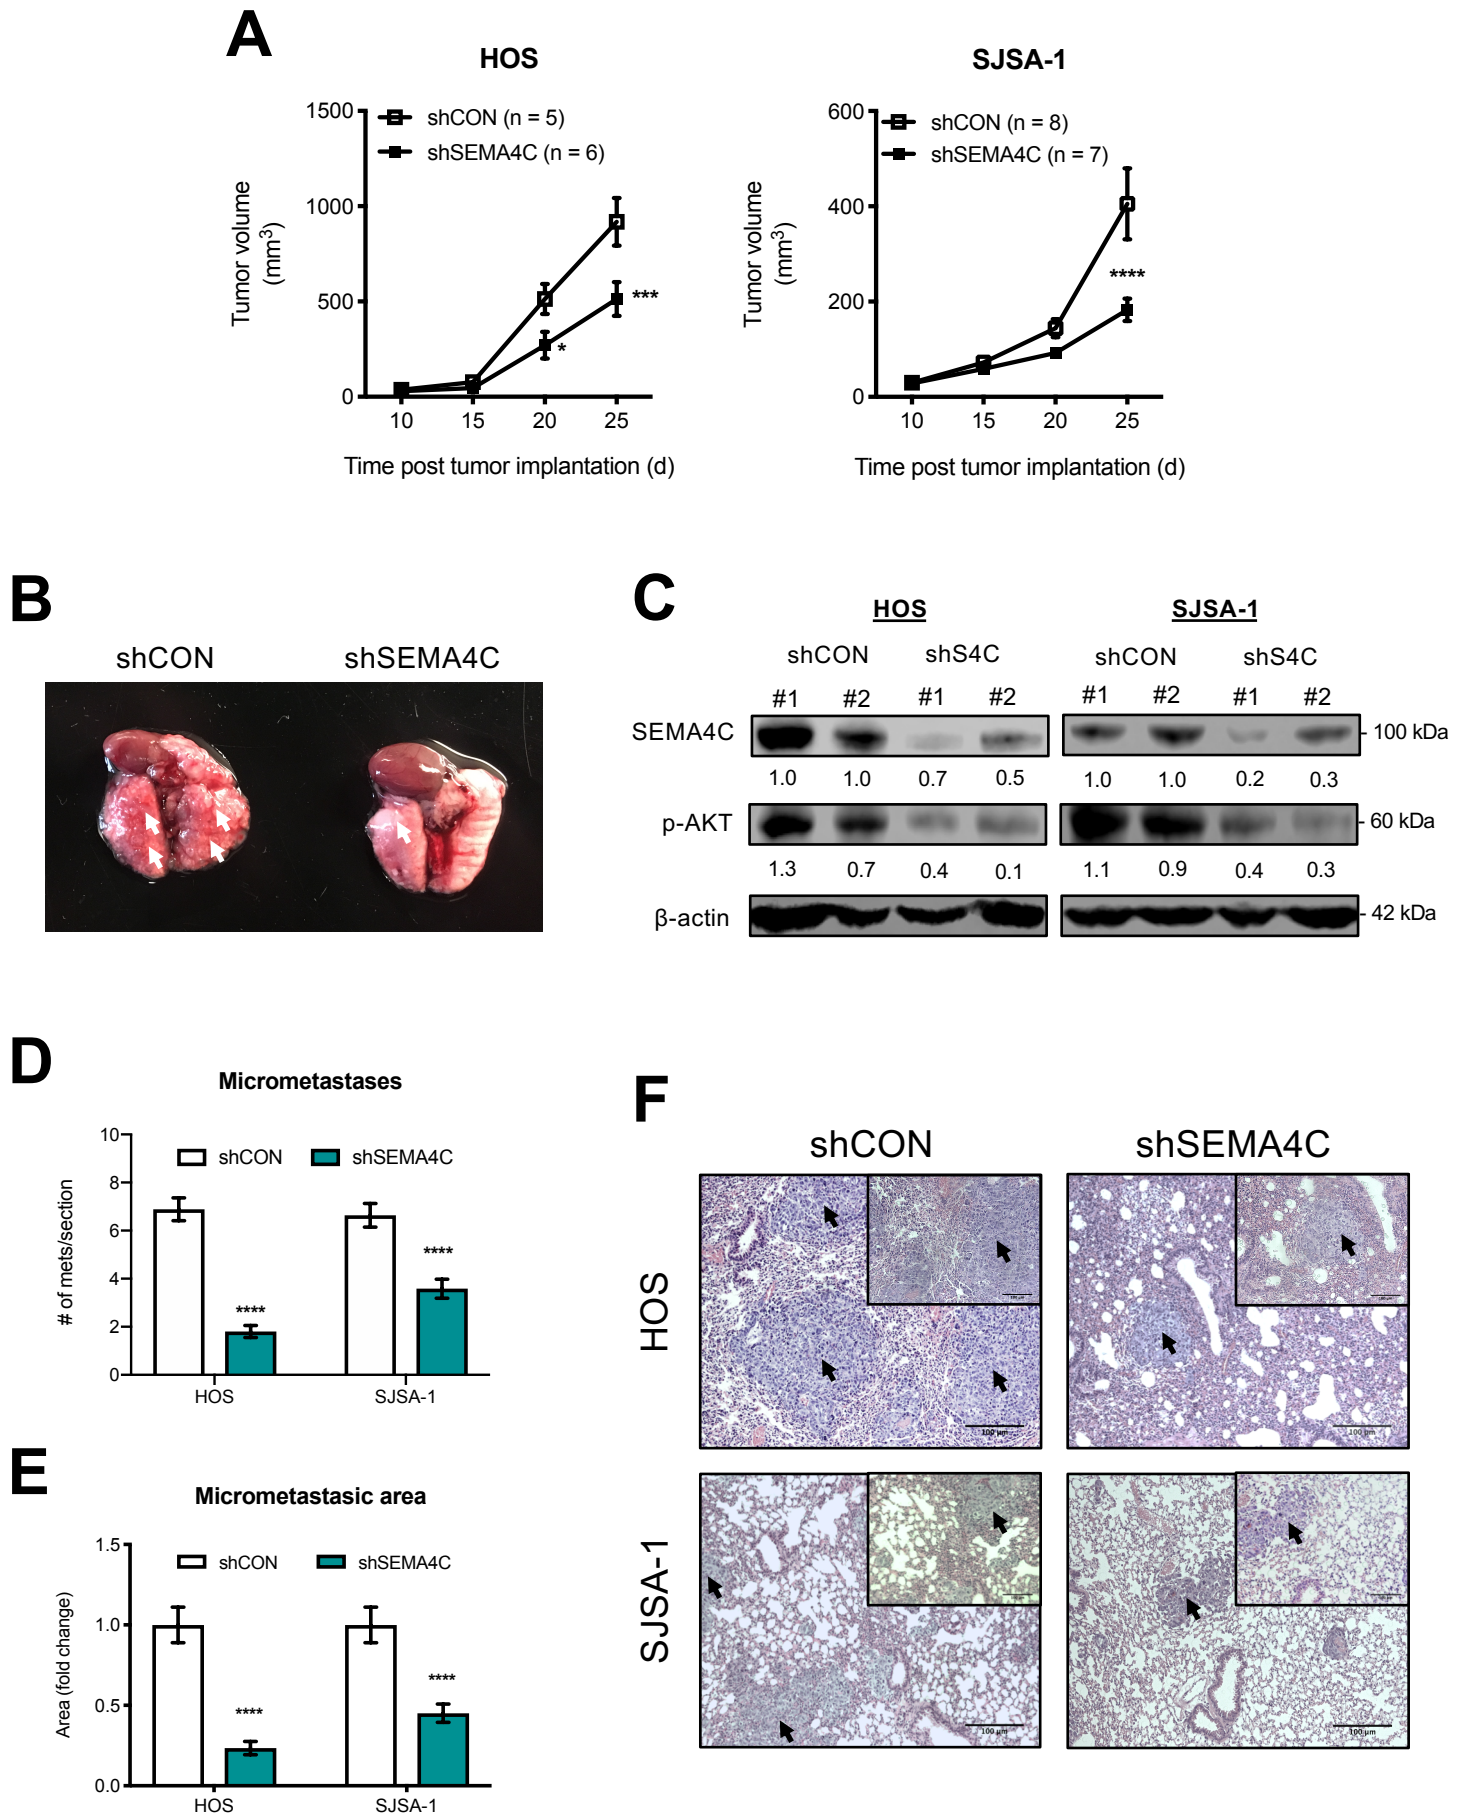

Fig. 5

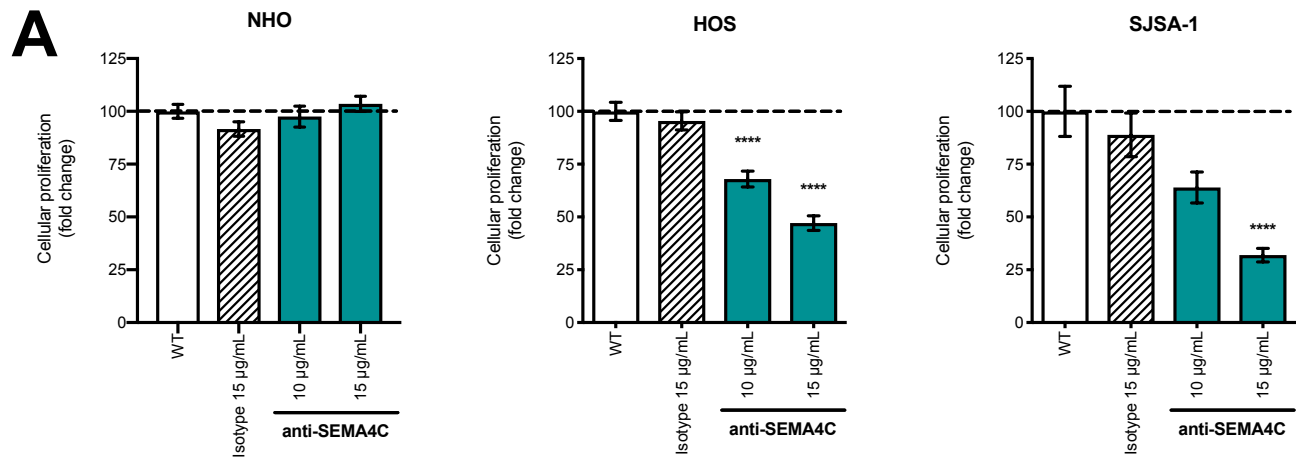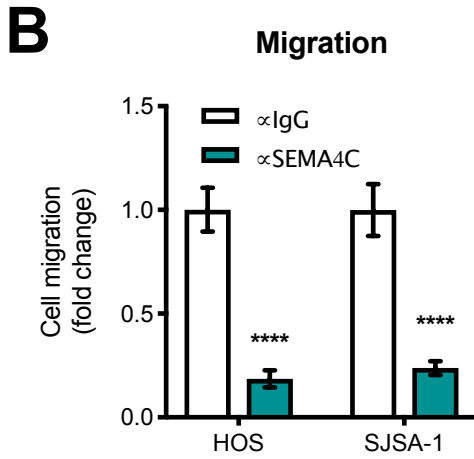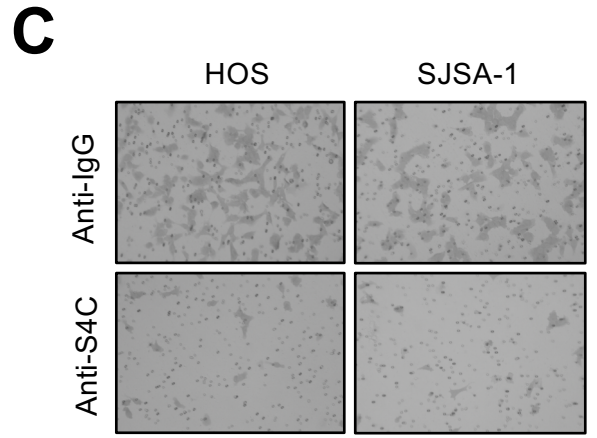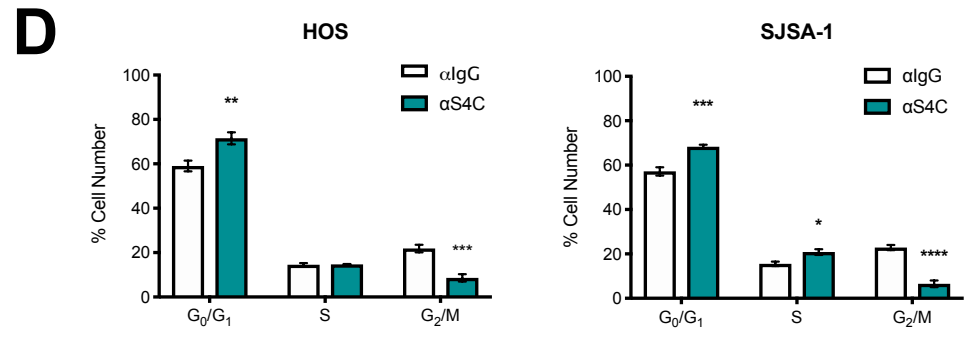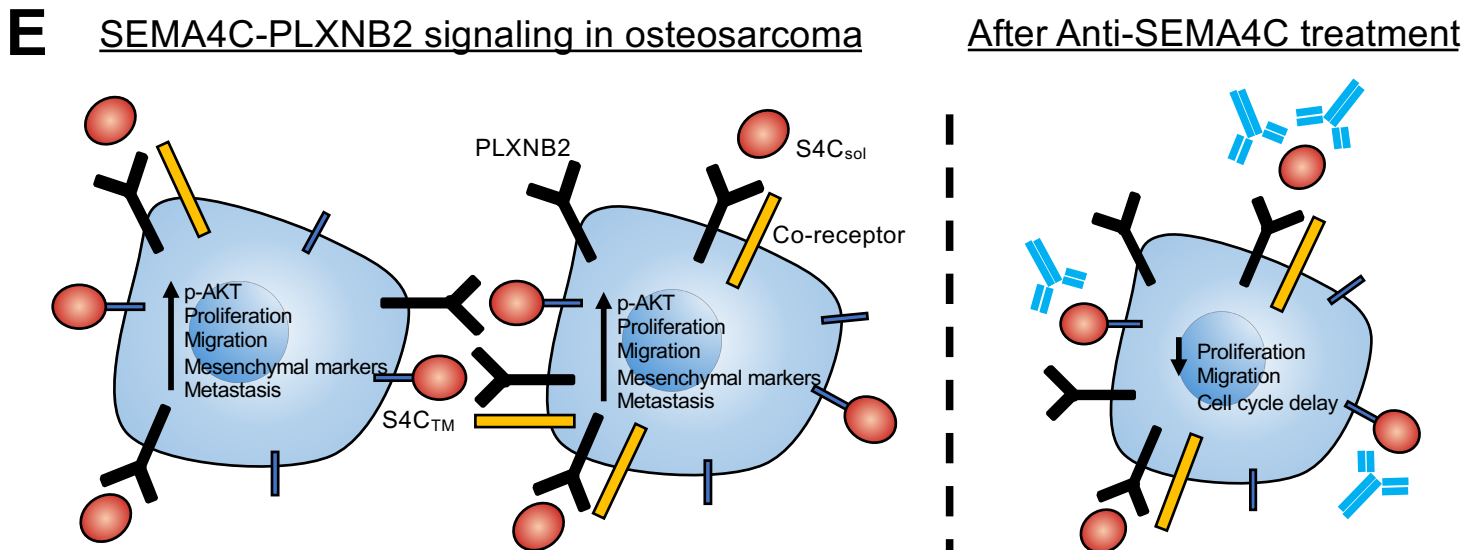

Fig. 6

---

---

**Primary antibodies**

---

---

| <b>Antigen</b> | <b>Source</b> | <b>Dilution</b> | <b>Catalog</b> | <b>Company</b>              |
|----------------|---------------|-----------------|----------------|-----------------------------|
| SEMA4C         | Mouse         | 1:250           | 136445         | Santa Cruz Biotechnology    |
| PLXNB2         | Sheep         | 1:500           | AF5329         | R & D Systems               |
| p-AKT (Ser473) | Rabbit        | 1:1000          | 4060           | Cell Signaling Technologies |
| AKT            | Rabbit        | 1:1000          | 4691           | Cell Signaling Technologies |
| B-ACTIN        | Mouse         | 1:5000          | 3700           | Cell Signaling Technologies |

---

---

---

**qRT-PCR primers**

---

---

| <b>Target</b> | <b>Sense</b>               | <b>Anti-sense</b>          |
|---------------|----------------------------|----------------------------|
| SNAI1         | 5'-GCAAATACTGCAACAAGG-3'   | 5'-GCACTGGTACTTCTTGACA-3'  |
| SNAI2         | 5'-AGATGCATATTCGGACCCAC-3' | 5'-CCTCATGTTTGTGCAGGAGA-3' |
| TWIST1        | 5'-GGAGTCCGCAGTCTTACGAG-3' | 5'-TCTGGAGGACCTGGTAGAGG-3' |
| B-ACTIN       | 5'-CACAGGGGAGGTGATAGCAT-3' | 5'-CTCAAGTTGGGGGACAAAAA-3' |

---

**A**

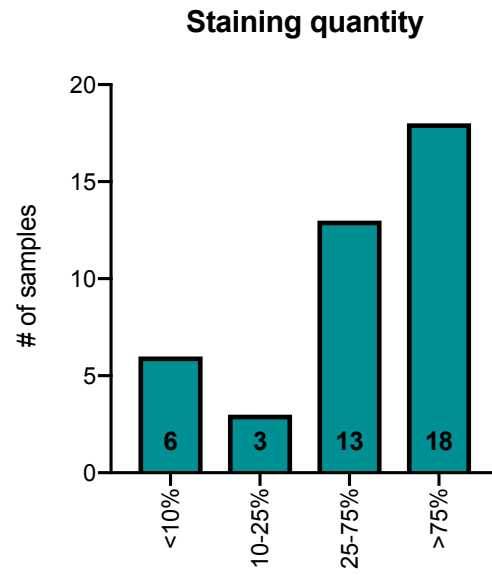

**B**

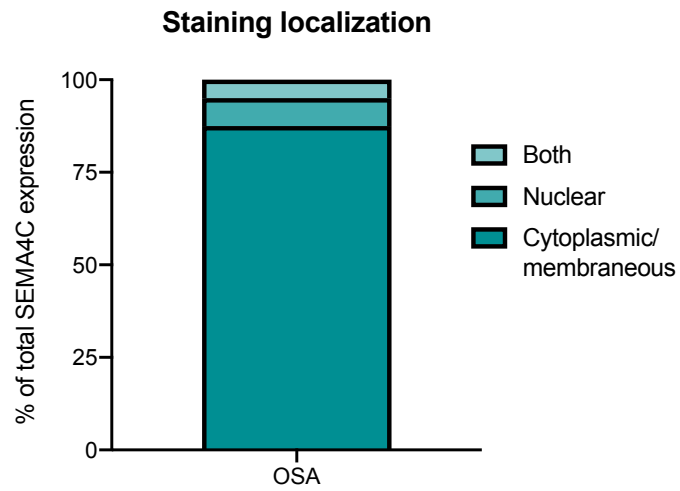

**A**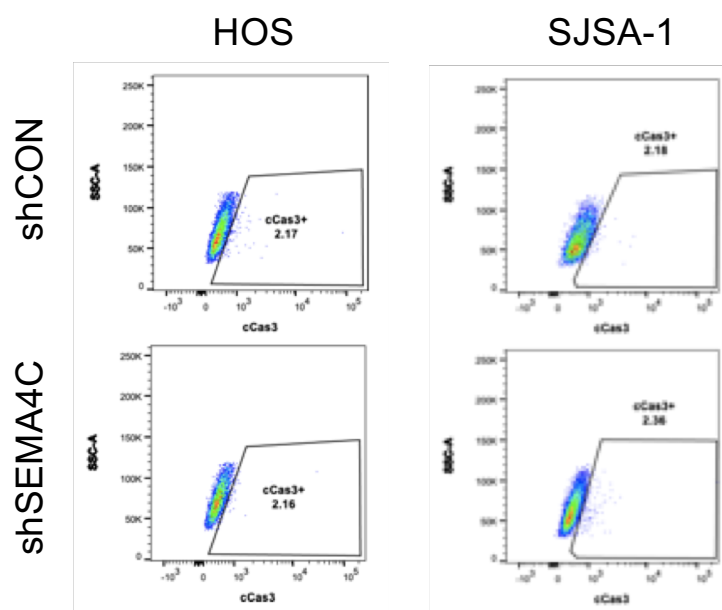**B**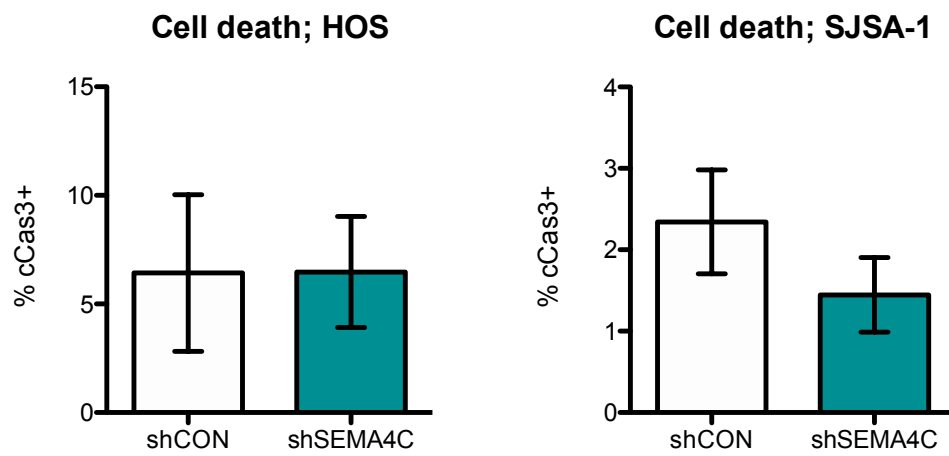

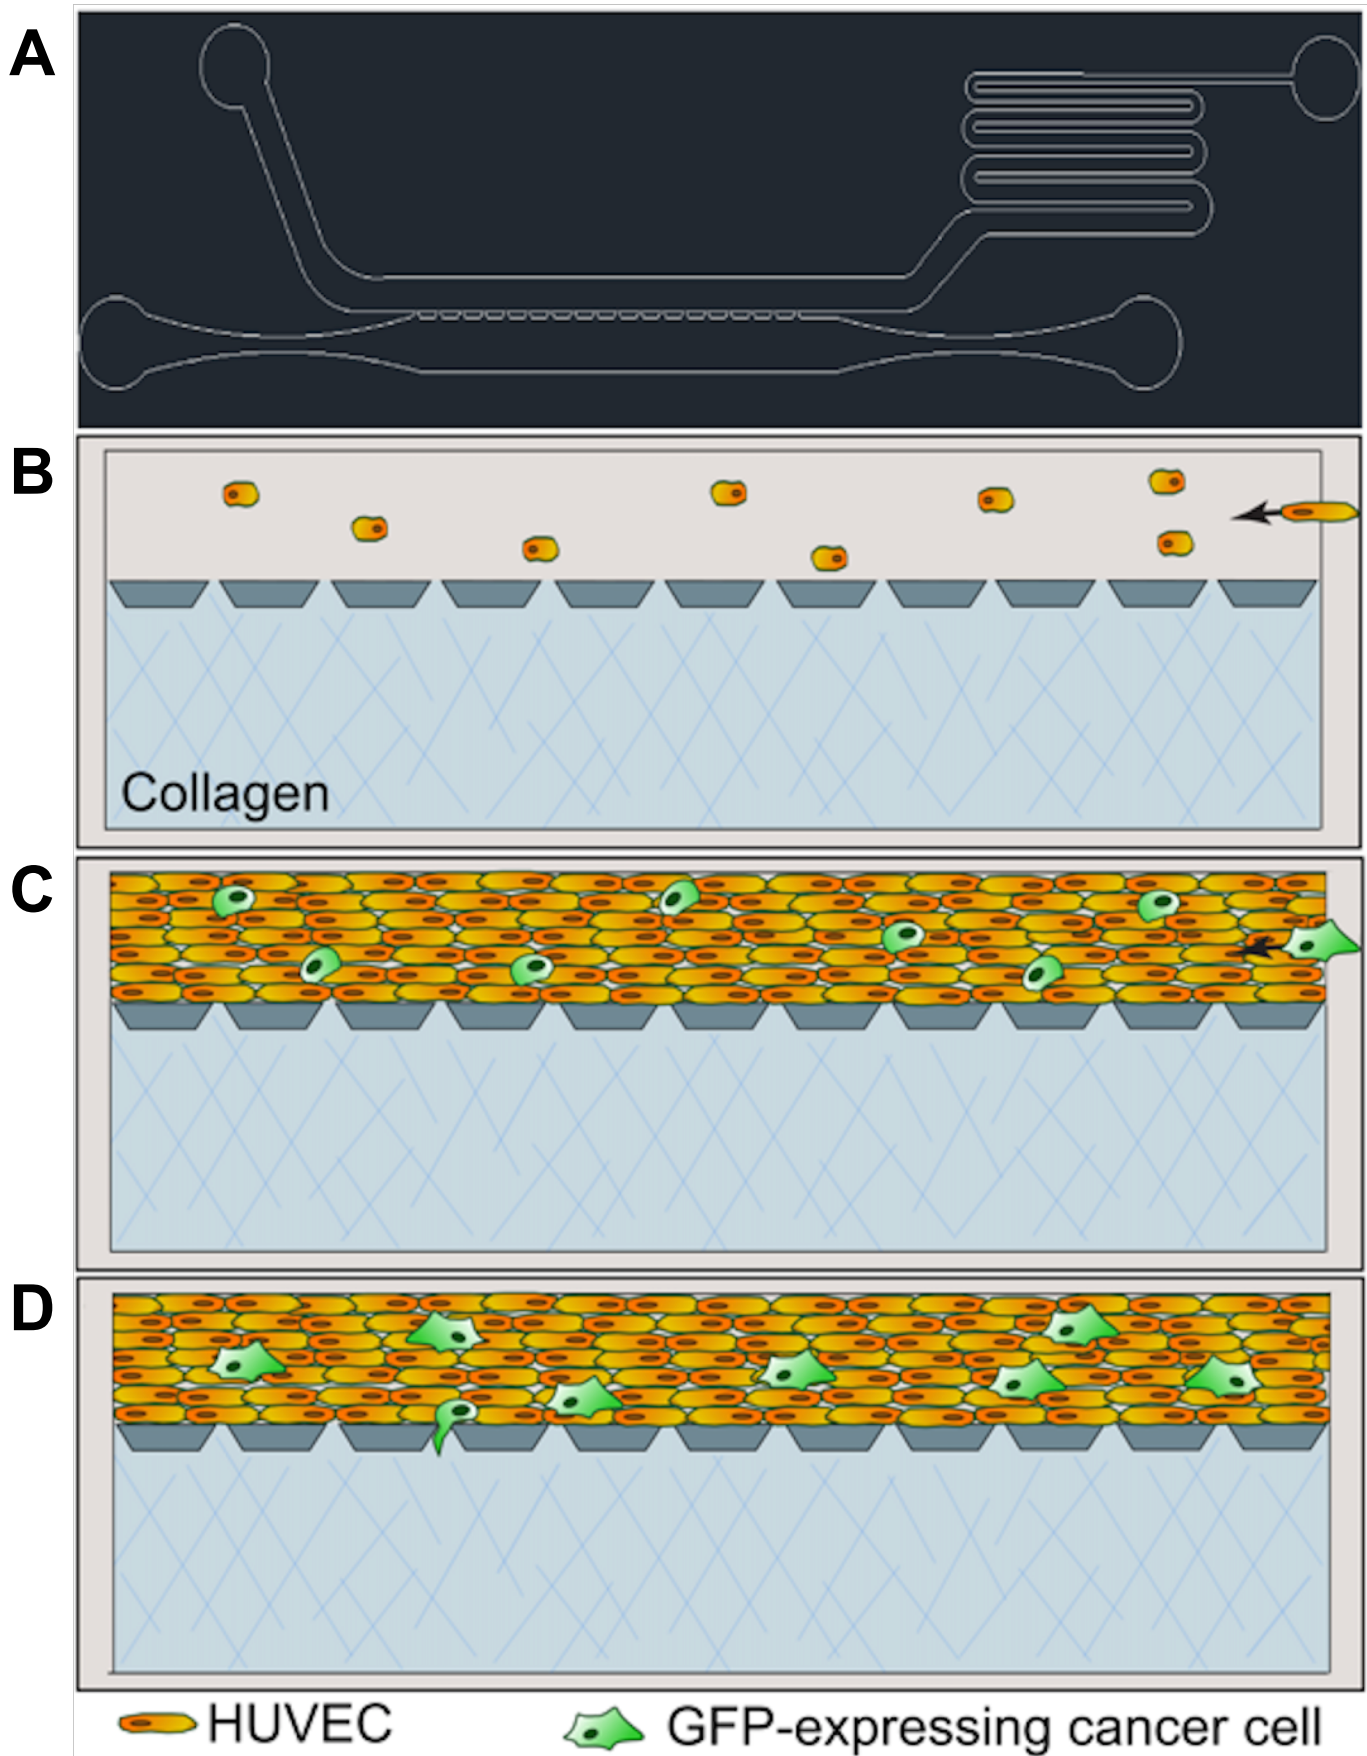

Supp Fig. 3

**A**

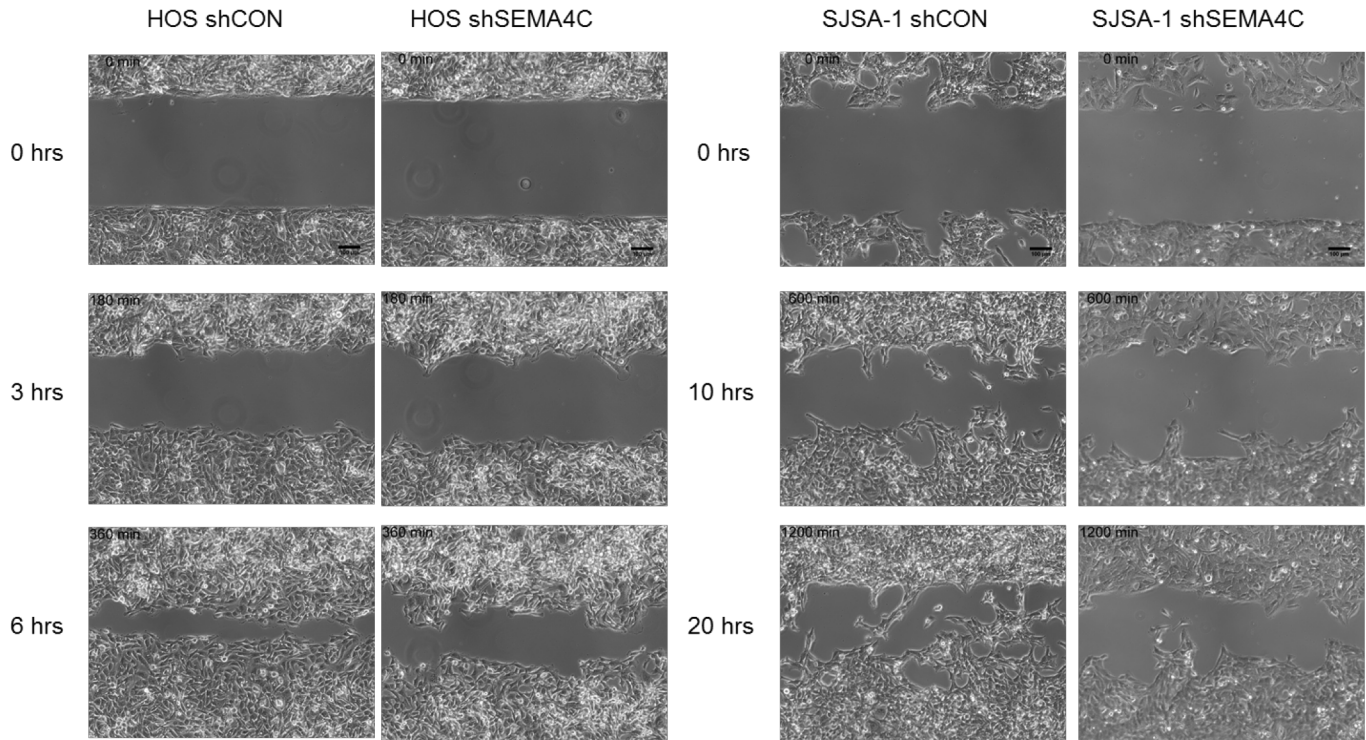

Source: https://www.biorxiv.org/content/10.1101/520452v1.full.pdf
